1 Gut-testis axis: microbiota-(n-3) PUFA improving semen quality  
2 in type 1 diabetes

3  
4 Running title: Gut microbiota improves semen quality in T1D

5  
6 Yanan Hao<sup>1,2,3#</sup>, Yanni Feng<sup>4#</sup>, Xiaowei Yan<sup>1,2#</sup>, Liang Chen<sup>1#</sup>, Ruqing Zhong<sup>1#</sup>,  
7 Xiangfang Tang<sup>1</sup>, Wei Shen<sup>2</sup>, Qingyuan Sun<sup>5</sup>, Zhongyi Sun<sup>6</sup>, Yonglin Ren<sup>3</sup>, Hongfu  
8 Zhang<sup>1,3\*</sup>, Yong Zhao<sup>1,3\*</sup>

9  
10 **Affiliations:**

11 <sup>1</sup>State Key Laboratory of Animal Nutrition, Institute of Animal Sciences, Chinese  
12 Academy of Agricultural Sciences, Beijing 100193, P. R. China

13 <sup>2</sup>College of Life Sciences, Qingdao Agricultural University, Qingdao 266109, P. R.  
14 China.

15 <sup>3</sup>College of Science, Health, Engineering and Education, Murdoch University, Perth  
16 6150, Australia.

17 <sup>4</sup>College of Veterinary Medicine, Qingdao Agricultural University, Qingdao 266109,  
18 P. R. China.

19 <sup>5</sup>Fertility Preservation Lab, Reproductive Medicine Center, Guangdong Second  
20 Provincial General Hospital, Guangzhou, 510317, P. R. China.

21 <sup>6</sup>Urology Department, Shenzhen university general hospital, Shenzhen 518055, P. R.  
22 China.

23

24 # These authors contributed equally

25

26 **\*Correspondence**

27 Yong Zhao, Ph.D., Professor

28 State Key Laboratory of Animal Nutrition

29 Institute of Animal Sciences

30 Chinese Academy of Agricultural Sciences  
31 Beijing 100193, P. R. China  
32 Tel: +86-10-62819432  
33 Email: [yzhao818@hotmail.com](mailto:yzhao818@hotmail.com); [Yong.Zhao@murdoch.edu.au](mailto:Yong.Zhao@murdoch.edu.au)  
34 **\*Co-correspondence**  
35 Hongfu Zhang, Ph.D., Professor  
36 State Key Laboratory of Animal Nutrition  
37 Institute of Animal Sciences  
38 Chinese Academy of Agricultural Sciences  
39 Beijing 100193, P. R. China  
40 Tel: +86-10-62819432  
41 Email: [zhanghongfu@caas.cn](mailto:zhanghongfu@caas.cn)

## 42 **Abstract**

43 Gut dysbiosis and type 1 diabetes (T1D) are closely related, and gut dysbiosis  
44 and male infertility are correlated, too. Moreover, most male T1D patients are of  
45 active reproductive age. Therefore, it is crucial to explore possible means for  
46 improving their semen quality. Here, we found that fecal microbiota transplantation  
47 (FMT) from alginate oligosaccharide (AOS) improved gut microbiota (A10-FMT)  
48 significantly decreased blood glucose and glycogen, and increased semen quality in  
49 streptozotocin-induced T1D subjects. A10-FMT improved T1D-disturbed gut  
50 microbiota, especially the increase in small intestinal *lactobacillus*, and blood and  
51 testicular metabolome to produce n-3 polyunsaturated fatty acid (PUFA)  
52 docosahexaenoic acid (DHA) and eicosapentaenoic acid (EPA) to ameliorate  
53 spermatogenesis and semen quality. Moreover, A10-FMT can improve spleen and  
54 liver function to strengthen the systemic environment for sperm development. FMT  
55 from gut microbiota of control animals (Con-FMT) produced some beneficial effects;  
56 however, to a smaller extent. Thus, AOS improved gut microbiota may be a useful  
57 protocol for improving semen quality and male fertility in T1D patients.

58 **Keywords:** Type 1 diabetes, A10-FMT, blood glucose, semen quality, DHA, EPA

59 **Importance**

60 Clinical data suggest that male reproductive dysfunction especially infertility is a  
61 critical issue for type 1 diabetic patient (T1D) because most of them are at the  
62 reproductive age. Gut dysbiosis is involved in T1D related male infertility. However,  
63 improved gut microbiota can be used to improve spermatogenesis and male fertility in  
64 T1D remains incompletely understood. We discovered that alginate oligosaccharide-  
65 improved gut microbiota (A10-FMT) significantly ameliorated spermatogenesis and  
66 semen quality. AOS-improved gut microbiota (specific microbes) may serve as a  
67 novel, promising therapeutic approach for the improvement of semen quality and  
68 male fertility in T1D patients.

## 69 **Introduction**

70 Type 1 diabetes (T1D), one of the most common metabolic disorders in children and  
71 young adults, is a multifactorial, immune-mediated disease that is characterized by the  
72 progressive destruction of autologous insulin-producing beta cells in the pancreas, and  
73 an increase in blood glucose levels (hyperglycemia)<sup>1-3</sup>. Diabetic hyperglycemia leads  
74 to further disorder, including cardiovascular disease, neuropathy, nephropathy,  
75 retinopathy, and male impotence. Moreover, clinical data from males with  
76 hyperglycemia-induced reproductive dysfunction are reported in most T1D studies<sup>4</sup>.  
77 This increase in diabetes in young persons is of great concern as it will increase  
78 fertility related disorders during their reproductive lifespan<sup>5</sup>. Furthermore, the  
79 frequency of diabetes mellitus (DM) in males is higher than in females, and the  
80 incidence of infertility among diabetic males is more common, which will likely  
81 contribute to the reduction of global birth rates and fertility<sup>4</sup>. Many investigations  
82 have found DM-induced male infertility at multiple levels, such as changes in  
83 spermatogenesis, testes, ejaculatory function and libido<sup>5,6</sup>. Additionally, cross-  
84 sectional studies reported that at the time of infertility diagnosis, young men are  
85 already less healthy than their fertile peers which suggests that male reproductive and  
86 somatic health are tightly correlated<sup>7</sup>.

87 Although T1D has a strong genetic basis, epigenetic and environmental factors  
88 (hygiene, antibiotic use, and diet) are involved in its development<sup>2,8</sup>. Furthermore, all  
89 of these potential environmental risk factors are related to the intestine and its  
90 microbiota. Specific alterations in the diversity of intestinal microflora have been  
91 reported to be one characteristic of diabetic patients by the epidemiological  
92 investigations<sup>9-11</sup>. Interaction of the gut microbes with the innate immune system  
93 plays vital roles in the development of T1D<sup>8</sup>. It has been reported that a reduction in

94 bacterial and functional diversity, and community stability are found in preclinical  
95 T1D patients, on the other hand *Bacteroidetes* is dominated<sup>12-15</sup>. The presence of  
96 small intestinal *Prevotella* are known to be inversely related to pancreatic beta cell  
97 function, however small intestinal *Desulfovibrio* are involved in preserved beta cell  
98 function<sup>8</sup>.

99 Very recently, it has been established that the gut microbiota plays crucial roles  
100 in spermatogenesis and male fertility<sup>16-19</sup>. Studies demonstrate a strong link between  
101 testicular function and the regulation of gut microbiota via host metabolomes, as  
102 beneficial microbiota have been shown to significantly improve busulfan impaired  
103 spermatogenesis and semen quality<sup>17,18</sup>. Since noting the high incidence of infertility  
104 in T1D male patients, many investigators have tried to improve the semen quality and  
105 fertility in T1D induced animal models<sup>20,21</sup>. It is reported that resveratrol attenuates  
106 reproductive alterations in T1D-induced rats with improvements in glycemic level,  
107 sperm quantitative and qualitative parameters, and the hormonal profile<sup>20</sup>. Liu et al.,  
108 found that metformin ameliorates testicular damage (90% of male DM patients have  
109 varying degrees of testicular dysfunction) in male mice with streptozotocin (STZ)-  
110 induced T1D through the PK2/PKR Pathway<sup>21</sup>. However, it is unknown whether  
111 impaired spermatogenesis and semen quality in the T1D condition can be improved  
112 by FMT or specific microbes. Therefore, this study aimed to explore possible  
113 improvements in spermatogenesis and semen quality made by alginate  
114 oligosaccharide (AOS) benefited microbiota which have previously been found to  
115 ameliorate busulfan or high fat diet disrupted spermatogenesis and male fertility.

## 116 **Materials and Methods**

### 117 **Study design:**

118 All animal procedures used in this study were approved by the Animal Care and

119 Use Committee of the Institute of Animal Sciences of Chinese Academy of  
120 Agricultural Sciences (IAS2020-106). Mice were maintained in specific pathogen-  
121 free (SPF) environment under a light: dark cycle of 12:12 h, at a temperature of 23 °C  
122 and humidity of 50%–70%; they had free access to food (chow diet) and water<sup>17,18,22</sup>.

123 *Experiment I: Mouse small intestine microbiota collection*<sup>17,18</sup>. Three-week-old  
124 ICR male mice were dosed with ddH<sub>2</sub>O as the control or AOS 10 mg/kg BW via oral  
125 gavage (0.1 ml/mouse/d). AOS dosing solution was freshly prepared on a daily basis  
126 and delivered every morning for three weeks. There were two groups (30  
127 mice/treatment): (1) Control (ddH<sub>2</sub>O); (2) A10 (AOS 10 mg/kg BW). After three  
128 weeks treatment, the animals were maintained on regular diet for three more days (no  
129 treatment). Then the mice were humanely euthanized to collect small intestinal  
130 luminal content (microbiota).

131 *Experiment II: STZ treatment and microbiota transplants (FMT)*<sup>17,18,23,24</sup>. The  
132 small intestine luminal content (microbiota) from each group was pooled and  
133 homogenized, diluted 1:1 in 20% sterile glycerol (saline) and frozen. Before  
134 inoculation, fecal samples were diluted in sterile saline to a working concentration of  
135 0.05 g/ml and filtered through a 70-µm cell strainer. Five-week-old ICR male mice  
136 were used in current investigation. There were four treatment groups (30  
137 mice/treatment): (1) Control (Regular diet plus Saline); (2) STZ (One dose STZ at  
138 135mg/kg body weight after preliminary screening)<sup>20</sup>; (3) Con-FMT [STZ plus gut  
139 microbiota from control mice (Experiment I)]; (4) A10-FMT [STZ plus gut  
140 microbiota from AOS 10 mg/kg mice (Experiment I)]. STZ was injected at the  
141 beginning of the experiment. Then the mice were received oral FMT inoculations (0.1  
142 ml) once daily for two weeks (five weeks of age to seven weeks of age). Then the  
143 mice were regularly maintained (on respective diet) for another three weeks (ten

144 weeks of age). Then, the mice were humanely euthanized to collect samples for  
145 different analyses (Fig. 1a; Study scheme).

146 **Evaluation of spermatozoa motility using a computer-assisted sperm analysis**

147 **system.** Spermatozoa motility was assessed using a computer-assisted sperm assay

148 (CASA) method according to World Health Organization guidelines<sup>22</sup>. After

149 euthanasia, spermatozoa were collected from the cauda epididymis of mice and

150 suspended in DMEM/F12 medium with 10% FBS and incubated at 37.5 °C for 30 min;

151 samples were then placed in a pre-warmed counting chamber. The micropic sperm

152 class analyzer (CASA system) was used in this investigation. It was equipped with a

153 20-fold objective, a camera adaptor (Eclipse E200, Nikon, Japan), and a camera

154 (acA780-75gc, Basler, Germany), and it was operated by an SCA sperm class

155 analyzer (MICROPTIC S.L.). The classification of sperm motility was as follows:

156 grade A linear velocity  $>22 \mu\text{m s}^{-1}$ ; grade B  $<22 \mu\text{m s}^{-1}$  and curvilinear velocity  $>5 \mu\text{m}$

157  $\text{s}^{-1}$ ; grade C curvilinear velocity  $<5 \mu\text{m s}^{-1}$ ; and grade D = immotile spermatozoa. The

158 spermatozoa motility data represented only grade A + grade B since only these two

159 grades are considered to be functional.

160 ***Morphological observations of spermatozoa.*** The extracted murine caudal

161 epididymides were placed in RPMI medium, finely chopped, and then Eosin Y (1%)

162 was added for staining as described previously<sup>22</sup>. Spermatozoon abnormalities were

163 then viewed using an optical microscope and were classified into head or tail

164 morphological abnormalities: two heads, two tails, blunt hooks, and short tails. The

165 examinations were repeated three times, and 500 spermatozoa per animal were scored.

166 **Assessment of acrosome integrity.** After harvest, mouse spermatozoa were

167 incubated at 37.5 °C for 30 min, after which a drop of sperm suspension was

168 uniformly smeared on a clean glass slide. Smeared slides were air dried and incubated



169 in methanol for 2 min for fixation. After fixation, the slides were washed with PBS  
170 three times. Assessment of an intact acrosome was accomplished by staining the  
171 sperm with 0.025% Coomassie brilliant blue G-250 in 40% methanol for 20 min at  
172 room temperature (RT). The slides were then washed three times with PBS and  
173 mounted with 50% glycerol in PBS. Acrosomal integrity was determined by an  
174 intense staining on the anterior region of the sperm head under bright-field  
175 microscopy (AH3-RFCA, Olympus, Tokyo, Japan) and scored accordingly<sup>22</sup>.

176 **RNA Isolation and RNA-seq analyses**<sup>22</sup>. Briefly, total RNA was isolated using  
177 TRIzol Reagent (Invitrogen) and purified using a Pure-Link1 RNA Mini Kit (Cat:  
178 12183018A; Life Technologies) following the manufacturers' protocol. Total RNA  
179 samples were first treated with DNase I to degrade any possible DNA contamination.  
180 Then the mRNA was enriched using oligo(dT) magnetic beads. Mixed with the  
181 fragmentation buffer, the mRNA was broken into short fragments (about 200 bp),  
182 after which, the first strand of cDNA was synthesized using a random hexamer-primer.  
183 Buffer, dNTPs, RNase H, and DNA polymerase I were added to synthesize the second  
184 strand. The double strand cDNA was purified with magnetic beads. Subsequently, 3'-  
185 end single nucleotide A (adenine) addition was performed. Finally, sequencing  
186 adaptors were ligated to the fragments. The fragments were enriched by PCR  
187 amplification. During the QC step, an Agilent 2100 Bioanalyzer and ABI  
188 StepOnePlus Real-Time PCR System were used to qualify and quantify the sample  
189 library. The library products were prepared for sequencing in an Illumina HiSeq<sup>TM</sup>  
190 2500. The reads were mapped to reference genes using SOAPaligner (v. 2.20) with a  
191 maximum of two nucleotide mismatches allowed at the parameters of “-m 0 -x 1000 -  
192 s 40 -l 35 -v 3 -r 2”. The read number of each gene was transformed into RPKM  
193 (reads per kilo bases per million reads), and then differentially expressed genes were

194 identified using the DEGseq package and the MARS (MA-plot-based method with  
195 random sampling model) method. The threshold was set as  $FDR \leq 0.001$  and an  
196 absolute value of  $\log_2$  ratio  $\geq 1$  to judge the significance of the difference in gene  
197 expression. Then on the data were analyzed by GO enrichment, KEGG enrichment.

198 **Sequencing of microbiota from intestine digesta samples and data analysis**<sup>22</sup>.

199 **DNA Extraction.** Total genomic DNA of small intestine, cecum and colon digesta  
200 was isolated using an E.Z.N.A.R Stool DNA Kit (Omega Bio-tek Inc., USA)  
201 following the manufacturer's instructions. DNA quantity and quality were analyzed  
202 using NanoDrop 2000 (Thermo Scientific, USA) and 1% agarose gel. Ten  
203 samples/groups were determined. **Library preparation and sequencing.** The V3-V4  
204 region of the 16S rRNA gene was amplified using the primers MPRK341F (50-  
205 ACTCCTACGGGAGGCAGCAG -30) and MPRK806R: (50-  
206 GGACTACHVGGGTWTCTAAT -30) with Barcode. The PCR reactions (total 30  $\mu$ L)  
207 included 15  $\mu$ L PhusionR High-Fidelity PCR Master Mix (New England Biolabs), 0.2  
208 mM primers, and 10 ng DNA. The thermal cycle was carried out with an initial  
209 denaturation at 98 °C, followed by 30 cycles of 98 °C for 10 s, 50 °C for 30 s, 72 °C  
210 for 30 s, and a final extension at 72 °C for 5 min. PCR products were purified using a  
211 GeneJET Gel Extraction Kit (Thermo Scientific, USA). The sequencing libraries were  
212 constructed with NEB NextR UltraTM DNA Library Prep Kit for Illumina (NEB,  
213 United States) following the manufacturer's instructions and index codes were added.  
214 Then, the library was sequenced on the Illumina HiSeq 2500 platform and 300 bp  
215 paired-end reads were generated at the Novo gene. The paired-end reads were merged  
216 using FLASH (V1.2.71). The quality of the tags was controlled in QIIME (V1.7.02),  
217 meanwhile all chimeras were removed. The "Core Set" of the Greengenes database<sup>3</sup>  
218 was used for classification, and sequences with >97% similarity were assigned to the

219 same operational taxonomic units (OTUs). *Analysis of sequencing data* Operational  
220 taxonomic unit abundance information was normalized using a standard of sequence  
221 number corresponding to the sample with the least sequences. The alpha diversity  
222 index was calculated with QIIME (Version 1.7.0). The Unifrac distance was obtained  
223 using QIIME (Version 1.7.0), and PCoA (principal coordinate analysis) was  
224 performed using R software (Version 2.15.3). The linear discriminate analysis effect  
225 size (LEfSe) was performed to determine differences in abundance; the threshold  
226 LDA score was 4.0. GraphPad Prism7 software was used to produce the graphs.

227 **Plasma and testis metabolite measurements by LC-MS/MS.** Plasma samples were  
228 collected and immediately stored at -80 °C. Before LC-MS/MS analysis, the samples  
229 were thawed on ice and processed to remove proteins. Testis samples were collected  
230 and the same amount of tissue from each mouse testis was used to isolate the  
231 metabolites using CH<sub>3</sub>OH: H<sub>2</sub>O (V: V) = 4:1. Then samples were detected by  
232 ACQUITY UPLC and AB Sciex Triple TOF 5600 (LC/MS) as reported previously<sup>17,22</sup>.  
233 Ten samples/groups were analyzed for plasma or testis samples. The HPLC  
234 conditions employed an ACQUITY UPLC BEH C18 column (100 mm × 2.1 mm, 1.7  
235 μm), solvent A [aqueous solution with 0.1% (v/v) formic acid], and solvent B  
236 [acetonitrile with 0.1% (v/v) formic acid] with a gradient program. The flow rate was  
237 0.4 mL/min and the injection volume was 5 μL. Progenesis QI v2.3 (Nonlinear  
238 Dynamics, Newcastle, UK) was implemented to normalize the peaks. Then the  
239 Human Metabolome Database (HMDB), Lipidmaps (v2.3), and METLIN software  
240 were used to qualify the data. Moreover, the data were processed with SIMCA  
241 software (version 14.0, Umetrics, Umeå, Sweden) following pathway enrichment  
242 analysis using the KEGG database (<http://www.genome.jp/KEGG/pathway.html>).

243 **Determination of blood glucose, insulin, ALT, TG, TC, T-AOC, GSH, SOD and**

244 **catalase.** Blood insulin was determined by the kit from Beijing Solarbio Science &  
245 Technology Co., Ltd (Beijing, P. R. China; Cat. #: SEKM0141). Blood glucose, ALT,  
246 TG, TC, T-AOC, SOD, and catalase were determined by the kits from Nanjing  
247 Jiancheng Bioengineering Institute [Nanjing, P.R. China; glucose (Cat. #: F006-1-1);  
248 ALT (Cat. #: C009-2-1); TG (Cat. #: A110-1-1); TC (Cat. #: A111-1-1); T-AOC (Cat.  
249 #: A015-2-1); GSH (Cat. #: A006-2-1); SOD (Cat. #: A001-3-2); Catalase (Cat. #:  
250 A007-1-1)]<sup>25</sup>. All the procedures were followed from the manufacturer's instructions.

251 **Measurement of iron content in spleen.** The amount of ferric iron in the spleens was  
252 determined by Perl's Prussian blue stain as described by Kohyama et al<sup>26</sup>. Spleen  
253 tissues were fixed with 4% paraformaldehyde, then embedded in paraffin. And 5 µm  
254 sections were cut and stained with Perl's Prussian blue and pararosaniline (Sigma).

255 **Histopathological analysis.** Testicular tissues were fixed in 10% neutral buffered  
256 formalin, paraffin embedded, cut into 5 µm sections and subsequently stained with  
257 hematoxylin and eosin (H&E) for histopathological analysis.

258 **Western blotting.** Western blotting analysis of proteins was carried out as previously  
259 reported<sup>17,22</sup>. Briefly, testicular tissue samples were lysed in RIPA buffer containing  
260 the protease inhibitor cocktail from Sangong Biotech, Ltd. (Shanghai, China). Protein  
261 concentration was determined using a BCA kit (Beyotime Institute of Biotechnology,  
262 Shanghai, China). Goat anti-actin was used as a loading control. The information for  
263 primary antibodies (Abs) were listed in [Supplementary Table 1](#). Secondary donkey  
264 anti-goat Ab (Cat no.: A0181) was purchased from Beyotime Institute of  
265 Biotechnology, and goat anti-rabbit (Cat no.: A24531) Abs were bought from Novex<sup>®</sup>  
266 by Life Technologies (USA). Fifty micrograms of total protein per sample were  
267 loaded onto 10% SDS polyacrylamide electrophoresis gels. The gels were transferred  
268 to a polyvinylidene fluoride (PVDF) membrane at 300 mA for 2.5 h at 4 °C. The

269 membranes were then blocked with 5% bovine serum albumin (BSA) for 1 h at RT,  
270 followed by three washes with 0.1% Tween-20 in TBS (TBST). The membranes were  
271 incubated with primary Abs diluted with 1:500 in TBST with 1% BSA overnight at  
272 4 °C. After three washes with TBST, the blots were incubated with the HRP-labelled  
273 secondary goat anti-rabbit or donkey anti-goat Ab respectively for 1 h at RT. After  
274 three washes, the blots were imaged. The bands were quantified using Image-J  
275 software. The intensity of the specific protein band was normalized to actin first, then  
276 the data were normalized to the control. The experiment was repeated >6 times.

### 277 **Detection of protein levels and location in testis using immunofluorescence**

278 **staining.** The methodology for immunofluorescence staining of testicular samples is  
279 reported in our recent publications<sup>17,22</sup>. Sections of testicular tissue (5 µm) were  
280 prepared and subjected to antigen retrieval and immunostaining as previously  
281 described<sup>17,22</sup>. Briefly, sections were first blocked with normal goat serum in PBS,  
282 followed by incubation with primary Abs ([Supplementary Table 1](#); 1:100 in PBS-  
283 0.5% Triton X-100; Bioss Co. Ltd. Beijing, PR China) at 4 °C overnight. After a brief  
284 wash, sections were incubated with an Alexa 546-labeled goat anti-rabbit secondary  
285 Ab (1:100 in PBS; Molecular Probes, Eugene, OR, USA) at RT for 30 min and then  
286 counterstained with 4',6-diamidino-2-phenylindole (DAPI). The stained sections were  
287 examined using a Leica Laser Scanning Confocal Microscope (LEICA TCS SP5 II,  
288 Germany). Ten animal samples from each treatment group were analysed. Positively  
289 stained cells were counted. A minimum of 1000 cells were counted for each sample of  
290 each experiment. The data were then normalized to the control.

291 **Statistical analysis.** Data were analyzed using SPSS statistical software (IBM Co.,  
292 NY) with one-way analysis of variance (ANOVA) followed by LSD multiple  
293 comparison tests or T-test. The data were shown as the mean ± SEM. Statistical

294 significance was based on  $p < 0.05$ .

## 295 **Data availability**

296 Liver and spleen RNA-seq raw data were deposited in NCBI's Gene Expression  
297 Omnibus under accession number GSE184021 and GSE184023, respectively. The  
298 microbiota raw sequencing data generated in this study has been uploaded to the  
299 NCBI SRA database with the accession number PRJNA759114 (small intestine),  
300 PRJNA759089 (cecum), and PRJNA759063 (colon).

## 301 **Results**

### 302 *A10-FMT decreased blood glucose, ameliorated STZ-induced T1D diminished* 303 *semen quality, and impaired gut microbiota*

304 Three days after STZ treatment (one dose, 135 mg/kg body weight), blood glucose  
305 was significantly higher in the STZ group [ $23.8 \pm 2.1$  mmol/L (mM)] than that in the  
306 control group (Con;  $8.2 \pm 1.3$  mM) which indicated that the animals were diabetic  
307 (T1D; [Fig. 1a](#); Study scheme). After five weeks treatment, the body weight and blood  
308 insulin were lower in STZ group than that in Con, while FMT from AOS improved  
309 gut microbiota (A10-FMT) produced a slight increase in body weight and blood  
310 insulin over STZ [no significant difference between STZ, A10-FMT, and FMT from  
311 gut microbiota of control animals (Con-FMT); [Supplementary Fig. 1a and b](#)]. After  
312 five weeks of treatment, blood glucose was significantly higher in STZ while it was  
313 significantly decreased by A10-FMT and Con-FMT ([Fig. 1b](#)) which indicated that  
314 FMT treatment improved T1D status<sup>8</sup>. At the same time blood glycogen was higher in  
315 STZ animals while it was reduced by A10-FMT but not Con-FMT ([Fig. 1c](#)), which  
316 further suggested that A10-FMT improved T1D status. STZ significantly diminished  
317 semen quality through decreasing sperm motility and concentration ([Fig. 1d and e](#)).  
318 However, A10-FMT significantly increased sperm motility and concentration, while

319 Con-FMT produced a slight change (Fig. 1d and e). The data suggest that A10-FMT  
320 contained beneficial microbiota for improving semen quality.

321 Gut dysbiosis has been reported in both T1D humans and animal models<sup>9-11</sup>.  
322 Moreover, dysbiosis may also impair spermatogenesis to decrease semen quality. In  
323 the current investigation, we found a similar phenomenon as the microbiota in the  
324 small intestine, cecum, and colon were changed in T1D animals with an increase in  
325 the harmful bacteria *Bacteroides*, *Mycoplasma*, and *Escherichia*<sup>8,12</sup> (Fig. 2; Fig. 3;  
326 Supplementary Fig. 1c-n). A10-FMT increased the beneficial microbiota  
327 *Lactobacillus* in the small intestine, while decreasing the harmful bacteria *Escherichia*  
328 in the cecum and colon (Fig. 2d and h; Fig. 3d; Supplementary Fig. 1c-n). However,  
329 Con-FMT decreased *Bacteroides*, *Mycoplasma*, and *Escherichia*, but did not increase  
330 *Lactobacillus* (Fig. 2; Fig. 3; Supplementary Fig. 1c-n).

331 The gut microbiota participates in host metabolism by interacting with host  
332 signaling pathways. Kyoto Encyclopedia of Genes and Genomes (KEGG) analysis of  
333 changed microbiota genes found that 12 major signaling pathways were upset by STZ  
334 and recovered by A10-FMT and/or Con-FMT in the colon, cecum, and/or small  
335 intestine (Fig. 3e). Interestingly, the “biosynthesis of other secondary metabolites”  
336 pathway was increased by A10-FMT specifically in the colon, and the “energy  
337 metabolism” pathway was decreased by STZ while increased by A10-FMT in the  
338 colon; meanwhile, the “carbohydrate metabolism” pathway was increased by A10-  
339 FMT while decreased by Con-FMT in the small intestine (Fig. 3e). However, the  
340 “metabolism of terpenoids and polyketides”, “amino acid metabolism”, and “lipid  
341 metabolism” pathways were only increased by Con-FMT in the cecum; the  
342 “carbohydrate metabolism” pathway was decreased only by Con-FMT in the colon;  
343 and the “cell motility” pathway was only increased by Con-FMT in the small intestine

344 (Fig. 3e). Moreover, the “Energy metabolism” pathway in the cecum, “amino acid  
345 metabolism” pathway in the small intestine, and “metabolism of cofactor and  
346 vitamins” pathway in the small intestine were decreased by both A10-FMT and Con-  
347 FMT, while they were not changed by STZ; “membrane transport” pathway in the  
348 cecum, and “metabolism of other amino acids” and “lipid metabolism” in the small  
349 intestine were increased by both A10-FMT and Con-FMT while they remained  
350 unchanged by STZ; “xenobiotics biodegradation and metabolism” was decreased by  
351 STZ while increased by both A10-FMT and Con-FMT (Fig. 3e). The data indicated  
352 that A10-FMT and Con-FMT differentially modified gut microbiota and microbial  
353 function to affect blood metabolites and other processes such as spermatogenesis.

#### 354 *A10-FMT-recovered gut microbiota improved the blood metabolome*

355 T1D is a metabolic related disease, and gut microbiota influence the blood  
356 metabolome; therefore, we next explored blood metabolome changes using LC/MS  
357 (Data Set 1). KEGG enrichment analysis of changed microbiota genes indicated that  
358 the “carbohydrate metabolism” pathway was increased by A10-FMT in the small  
359 intestine, and it was interesting to note that blood carbohydrate was increased by STZ  
360 while decreased by A10-FMT or Con-FMT (Fig. 4a).

361 Two other large clusters of compounds were decreased by STZ while increased  
362 by A10-FMT including flavonoids (Fig. 4b-d; Supplementary Fig. 2a), and  
363 glycerophosphocholines/ glycerophosphoethanolamines (Fig. 4e-h; Supplementary  
364 Fig. S2b-i). Flavonoids are compounds that play important roles in antioxidant  
365 activity and other functions to protect organisms. Glycerophosphocholines and  
366 glycerophosphoethanolamines have protective functions within the body.

367 In addition, melatonin, that has antioxidant effects along with many other  
368 functions, was decreased by STZ while increased by A10-FMT and Con-FMT (Fig.



369 4i) although at non-significant levels, which suggested that FMT could help increase  
370 systemic antioxidant capabilities. L-carnitine, an important compound involved in  
371 male sperm formation and function, was decreased by STZ while increased by A10-  
372 FMT but not by Co-FMT (Fig. 4j) which suggested that A10-FMT and Con-FMT  
373 differentially influence blood metabolism especially for antioxidant compound  
374 production. The data were consistent with gut microbiota data that A10-FMT  
375 increased *Lactobacillus* which have been shown to produce metabolites that improve  
376 liver or cardiac impairment<sup>27-29</sup> (Fig. 3e). Most interestingly, blood n-3  
377 polyunsaturated acid (PUFA) eicosapentaenoic acid (EPA) was decreased by STZ  
378 while increased by A10-FMT and Con-FMT (Fig. 4k). It is known that n-3 PUFA  
379 especially EPA and DHA are important for many aspects of our health, including  
380 spermatogenesis<sup>30-32</sup>.

381 ***A10-FMT-improved blood metabolite ameliorated testicular metabolome (PUFA***  
382 ***and retinoic acid) and the testicular microenvironment***

383 The blood metabolome was upset in T1D (by STZ) while it recovered under treatment  
384 with A10-FMT and/or Con-FMT, which suggested that FMT creates beneficial  
385 systemic improvements in animals. Blood metabolites are important for testis growth  
386 and sperm development<sup>17,18,22</sup>; the blood metabolome and testicular metabolome are  
387 connected together, therefore, we set out to determine the testicular metabolome using  
388 LC/MS.

389 It was notable that the testicular n-3 PUFAs DHA and EPA were increased by  
390 A10-FMT but not by Con-FMT (Fig. 5a-c; Supplementary Fig. 3a; Data Set 2), which  
391 further suggested that A10-FMT is beneficial for testicular metabolism. The retinoic  
392 acid pathway plays a crucial role in spermatogenesis<sup>33,34</sup>; and PUFA and retinoic acid  
393 signaling interact together to regulate spermatogenesis<sup>35,36</sup>. STZ decreased retinol or

394 retinoic acid related compounds while A10-FMT increased them (Fig. 5d and e;  
395 Supplementary Fig. 3b-d) which suggested that spermatogenesis was initiated by  
396 A10-FMT since retinoic acid turns meiosis on. Moreover, the protein levels of the  
397 spermatogonia cell marker genes PLZF and DAZL were elevated by A10-FMT (Fig.  
398 5f) which confirmed initiation of the spermatogenesis process. Moreover, testosterone  
399 levels were increased by A10-FMT (Fig. 5g-i; Supplementary Fig. 3e-g); steroids  
400 other than testosterone were increased by A10-FMT while they were decreased by  
401 STZ (Fig. 5j and k; Supplementary Fig. 3h-l) which together further confirmed  
402 initiation of spermatogenesis. Similarly, in the blood, testicular  
403 glycerophosphocholines were increased by A10-FMT while they were decreased by  
404 STZ (Fig. 5l; Supplementary Fig. 3m-o). Melatonin metabolite 6-hydroxymelatonin,  
405 an active form of melatonin<sup>37</sup>, was increased by A10-FMT (Fig. 5m) which indicated  
406 that A10-FMT modulated both the systemic antioxidant status and also the testicular  
407 microenvironment to benefit spermatogenesis.

408 ***A10-FMT-improved testicular microenvironment benefited spermatogenesis to***  
409 ***improve semen quality***

410 A10-FMT improved the testicular metabolome, especially through increased DHA  
411 and EPA which suggested that spermatogenesis should be improved. Spermatogenesis  
412 was indeed improved by A10-FMT (Fig. 6). The protein level (number of positive  
413 cells) of germ cell marker *VASA (DDX4)* was decreased in T1D animals while  
414 increased by A10-FMT (Fig. 6a and b). The protein level (number of positive cells) of  
415 the meiosis marker gene *SYCP3* was increased by A10-FMT while reduced by STZ  
416 (Fig. 6a and c). The protein level (number of positive cells) of transition protein 1  
417 (*TPI1*) was increased by A10-FMT (Fig. 6a and d). The protein level (number of  
418 positive cells) of the sperm protein *PGK2* was decreased by STZ while increased by

419 A10-FMT (Fig. 6a and e). Moreover, the protein levels of some of the important  
420 genes for spermatogenesis *CREM*, *B-MYB*, *PIWIL1*, *ODF1*, *PGK2*, and *TPI* were  
421 determined by Western blotting. It was noteworthy that all these proteins were  
422 elevated by A10-FMT (Fig. 6f and g) which confirmed the IHF data and also  
423 suggested that spermatogenesis was improved by A10-FMT. At the same time the  
424 Sertoli cell marker gene *SOX9* was detected by IHF; it was shown that the number of  
425 *SOX9* positive cells remained unchanged by STZ or A10-FMT compared to Con (Fig.  
426 6h). The data suggested that STZ impaired germ cells, but not somatic cells, to  
427 diminish spermatogenesis.

428 ***Furthermore, A10-FMT-improved gut microbiota benefited spleen immune***  
429 ***function and liver function to strengthen the systemic environment for***  
430 ***spermatogenesis***

431 The spleen plays vital roles in systemic immune function<sup>38,39</sup>. Recently, it has been  
432 established that the gut microbiota is involved in spleen development and  
433 function<sup>38,39</sup>; and a gut-spleen interaction (axis) has been identified. In the current  
434 investigation, STZ also disrupted spleen function. Spleen RNA-seq data showed that  
435 STZ upset spleen gene expression while this was recovered by A10-FMT and/or Con-  
436 FMT (Supplementary Fig. S4). Gene enrichment analysis also showed that functions  
437 upset by STZ were reversed by A10-FMT or Con-FMT (Fig.7a; Supplementary Fig.  
438 4a and b). “Adapted immune response”, “Complement cascade”, and “Platelet  
439 activation”, “Complement and coagulation cascade”, and “hemostasis” functional  
440 pathways were enriched for the genes decreased by STZ while they were increased by  
441 A10-FMT, which indicated that the immune and vasculature systems may be affected  
442 by STZ and recovered by A10-FMT. The “hemostasis” functional pathway indicated  
443 that STZ affected blood supply to the spleen, and it was confirmed by the expression

444 of hemoglobin scavenger receptor (CD163) protein. CD163 is known to play major  
445 roles in the clearance and endocytosis of hemoglobin/haptoglobin complexes<sup>26</sup>. STZ  
446 decreased CD163 protein levels in the spleen while these were recovered by A10-  
447 FMT (Fig.7b).

448 A10-FMT improved spleen immune functions. T-cell protein CCL21 and its  
449 receptor CCR7 play crucial roles in maintaining the active migratory state of T cells<sup>40</sup>.  
450 STZ decreased CCL21 protein levels (or positive cells) in the spleen while this was  
451 reversed by A10-FMT but not Con-FMT (Fig.7c). At the same time, the protein levels  
452 (or positive cells) of CCR7 were reduced by STZ while they were recovered by A10-  
453 FMT but not Con-FMT (Fig.7d). Moreover, the spleen plays important roles in iron  
454 homeostasis through the resorption of effete erythrocytes and the subsequent return of  
455 iron to the circulation. Free iron has the potential to become cytotoxic when electron  
456 exchange with oxygen is unrestricted and catalyzes the production of reactive oxygen  
457 species. Therefore, the balance of iron in the spleen and circulation is very important  
458 for health<sup>26,41,42</sup>. STZ increased the levels of iron in the spleen while this was reversed  
459 by A10-FMT but not Con-FMT (Fig.7e). Furthermore, the proliferation and apoptosis  
460 status of the spleen was recovered by A10-FMT (Supplementary Fig. 4c, d). The  
461 protein levels (or the number of positive cells) of cell proliferation marker Ki67 were  
462 reduced by STZ while they were increased by A10-FMT (Supplementary Fig. 4c).  
463 Furthermore, the protein levels of apoptosis markers p53 and Bax were diminished by  
464 STZ while they were recovered by A10-FMT (Supplementary Fig. 4d). All the data  
465 suggested that A10-FMT benefited spleen functions to assist with systemic immune  
466 functions since T1D is an important immune related disease<sup>1</sup>.

467 The liver plays a vital role in glucose metabolism and detoxification and many  
468 other functions maintain homeostasis. STZ upset liver function while this was

469 recovered by A10-FMT ([Supplementary Fig. 5](#)). The liver damage marker alanine  
470 aminotransferase (ALT) was increased in the blood while this was decreased by A10-  
471 FMT ([Supplementary Fig. 5a](#)). RNA-seq analysis also showed that STZ disrupted  
472 liver functions while this was reversed by A10-FMT and/or Con-FMT  
473 ([Supplementary Fig. 5b-d](#)). KEGG enrichment analysis indicated that liver lipid  
474 metabolism was upset by STZ while it was reversed by A10-FMT and/or Con-FMT  
475 ([Supplementary Fig. 5c and d](#)). Furthermore, blood triglyceride (TG) and total  
476 cholesterol (TC) levels were increased by STZ while these were reversed by A10-  
477 FMT and/or Con-FMT ([Supplementary Fig. 5e and f](#)).

478 Antioxidants also play important roles in maintaining systemic functions. Blood  
479 total antioxidant capability (T-AOC) level was reduced by STZ while it was  
480 recovered by A10-FMT ([Supplementary Fig. 5g](#)). At the same time the levels of anti-  
481 oxidant enzymes SOD and catalase were decreased by STZ while increased by A10-  
482 FMT ([Supplementary Fig. 5h and i](#)). The antioxidant compound GSH was also  
483 increased by A10-FMT ([Supplementary Fig. 5j](#)). At the same time liver apoptosis  
484 status was upset by STZ while it was recovered by A10-FMT ([Supplementary Fig.](#)  
485 [5k](#)). All the data suggested that A10-FMT had a strong capacity to improve levels of  
486 systemic antioxidants to benefit spermatogenesis since T1D induced hyperglycemia  
487 causes systemic oxidative stress<sup>4</sup>.

## 488 **Discussion**

489 Since gut dysbiosis and T1D are closely related, and 90% of male T1D patients have  
490 varying degrees of testicular dysfunction and male infertility; gut dysbiosis and male  
491 infertility are also correlated. As most male T1D patients are of reproductive age, it is  
492 worth exploring protocols for improving spermatogenesis and male fertility<sup>21</sup>. Many  
493 studies have used different procedures to increase fertility, such as resveratrol and

494 metformin, which are capable of improving semen quality to some extent<sup>20,21</sup>. Very  
495 recently, we found that FMT from AOS-improved gut microbiota rescues high fat diet  
496 disrupted spermatogenesis. In the current investigation, we found that FMT from  
497 AOS-improved gut microbiota (A10-FMT), but not FMT from gut microbiota of  
498 control animals (Con-FMT), significantly increased sperm concentration and motility  
499 in STZ-induced T1D animals. Moreover, A10-FMT significantly decreased blood  
500 glucose and glycogen which suggested that A10-FMT may be supportive management  
501 for T1D patients.

502 Higher levels of gut *Bacteroidetes* have been found in T1D patients compared  
503 with their peers<sup>12</sup>. We found similar results; *Bacteroidetes* was increased in the cecum  
504 and colon of STZ-induced T1D animals compared with control group. Both A10-FMT  
505 and Con-FMT decreased the amount of *Bacteroidetes*. Meanwhile, *Prevotella* has  
506 been found to be inversely related to pancreatic beta cell function, and *Desulfovibrio*  
507 to be positively correlated with beta cell function<sup>12</sup>. In the current study, we found  
508 *Desulfovibrio* was decreased in the cecum of STZ-induced T1D animals while A10-  
509 FMT and Con-FMT restored its levels; *Prevotella* was increased in the colon of STZ-  
510 induced T1D animals while A10-FMT and Con-FMT decreased its levels. As these  
511 results show beneficial outcomes, this suggests that FMT could improve gut  
512 microbiota.

513 Of great interest in the current study was our finding that the small intestine  
514 *Lactobacillus* population, which has been shown to have multiple functions in human  
515 health<sup>27-29,43,44</sup>, and is discussed below, was increased by A10-FMT but not by Con-  
516 FMT. *Lactobacillus plantarum* 299v is reported to improve vascular endothelial  
517 function and decrease systemic inflammation in men with coronary artery disease and  
518 it is suggested that circulating gut-derived metabolites likely account for these

519 improvements<sup>27</sup>. *Lactobacillus helveticus* R0052 has anti-inflammatory properties  
520 through downregulating Toll-like receptors, tumor necrosis factor- $\alpha$ , and nuclear  
521 factor- $\kappa$ B transcription in liver samples and decreasing proinflammatory cytokine  
522 plasma concentrations to alleviate hepatic injuries<sup>28</sup>. Meanwhile, *L. helveticus* R0052  
523 is known to improve carbohydrate and fatty acid metabolism and reduce lithocholic  
524 acid levels<sup>28</sup>. Lew et al. report that some selected *Lactobacillus* strains improve lipid  
525 profiles via activation of energy and lipid metabolism, suggesting the potential of  
526 *Lactobacillus spp.* as promising natural interventions for the alleviation of  
527 cardiovascular and liver diseases<sup>29</sup>. *Lactobacillus rhamnosus* GG ATCC53103 and  
528 *Lactobacillus plantarum* JL01, can improve growth performance and immunity of  
529 piglets, and relieve weaning stress-related immune disorders such as intestinal  
530 infections and inflammation<sup>43</sup>. The enhanced immunity in the latter study took place  
531 through increasing levels of tauroursodeoxycholic acid (TCDA) and docosahexaenoic  
532 acid (DHA); however there was a simultaneous decrease in succinic and palmitic  
533 acids<sup>43</sup>. *Lactobacillus plantarum* PCA 236 has been shown to beneficially modulate  
534 goat fecal microbiota and milk fatty acid composition<sup>44</sup>. These studies indicate that  
535 *Lactobacillus spp.* have the capacity to modify the production of polyunsaturated fatty  
536 acids such as DHA in animal blood or other organs.

537 It is known that DHA is crucial for spermatogenesis and male reproductive  
538 functions<sup>30-32</sup>; it has also been shown that DHA supplementation can fully restore  
539 fertility and spermatogenesis in male mice<sup>31</sup>. Meanwhile, Gallardo et al. report that a  
540 high fat diet decreases testicular DHA levels, which may be related to the production  
541 of dysfunctional spermatozoa<sup>32</sup>. The identification of beneficial n-3 PUFAs in this  
542 study was enlightening; we suggest that DHA and EPA were increased by A10-FMT  
543 in the blood and testes which was correlated with the increase in *Lactobacillus* in the

544 small intestine following A10-FMT treatment. The current and previous studies have  
545 demonstrated that *Lactobacillus spp.* have the potential to improve DHA levels, which  
546 is important for aspects of health, including improvements in spermatogenesis.  
547 Furthermore, testosterone is a strategic player in spermatogenesis, and approximately  
548 94.4% of diabetes cases are associated with hypotestosteronemia. Moreover, the  
549 incidence of sexual and reproductive dysfunction in diabetic patients is 5–10-fold  
550 higher than that in nondiabetic individuals<sup>21</sup>. In current study, A10-FMT increased the  
551 testicular testosterone levels, which may account for the improvement of  
552 spermatogenesis and semen quality.

553 T1D is an immune related disease, and perturbations in the gut microbiota can  
554 impair the functions of immune cells and vice-versa<sup>10</sup>. Such dysbiosis is often  
555 detected in T1D subjects, especially those with an adverse immunoresponse<sup>10</sup>. As an  
556 organ of immunity, the spleen plays important roles in our health<sup>38</sup>; furthermore, it has  
557 been established that the gut-spleen axis affects spleen development and human  
558 health<sup>38,39</sup>. In the current study, we found that STZ-induced T1D disrupted spleen  
559 function while A10-FMT rescued it through the improvement of immune cell function  
560 and iron levels. Free iron levels in the spleen or liver may potentially become  
561 cytotoxic as they can catalyze the production of reactive oxygen species (ROS)<sup>41</sup>.  
562 A10-FMT beneficially decreased spleen iron levels, reduced apoptosis protein levels,  
563 and increased cell proliferation marker ki67 levels, all of which indicate  
564 improvements in spleen function<sup>26</sup>. Macrophages, indispensable immune cells, also  
565 play important roles in the regulation of spleen iron levels<sup>41,42</sup>, which further suggests  
566 that A10-FMT improves spleen immune function. This improvement in spleen  
567 function may support systemic health and spermatogenesis.

568 The main characteristic of T1D is hyperglycemia which can induce oxidative



569 stress, increase endoplasmic reticulum stress, and impair mitochondrial function<sup>4</sup>. We  
570 found that STZ-induced T1D decreased T-AOC level and the levels of some  
571 antioxidant enzymes, such as SOD, while A10-FMT restored them. We also detected  
572 that STZ-induced T1D caused liver damage through increasing ALT levels, while  
573 A10-FMT recovered it. At the same time A10-FMT improved liver function by  
574 modulating the apoptotic status in liver cells.

575 In summary, in our animal model, STZ-induced T1D disrupted spermatogenesis  
576 to diminish semen quality through decreasing sperm concentration and sperm  
577 motility. Most importantly, STZ-induced T1D caused gut dysbiosis. A10-FMT and  
578 Con-FMT decreased blood glucose levels and improved gut microbiota through the  
579 reduction of “harmful” microbes and increase in “beneficial” microbes. Most  
580 importantly, A10-FMT enhanced specific beneficial microbiota such *Lactobacillus* to  
581 increase the production of n-3 PUFA, such as DHA and EPA, to ameliorate  
582 spermatogenesis and semen quality while Con-FMT did not. Moreover, A10-FMT  
583 specifically improved spleen and liver function to promote sperm development and  
584 increase semen quality. Thus, AOS improved gut microbiota may support the  
585 improvement of semen quality and male fertility in T1D patients.

586 **Acknowledgements**

587 We thank the investigators and staff of The Beijing Genomics Institute (BGI) and  
588 Shanghai LUMING Biotechnology CO., LCD for technical support. This study was  
589 supported by the National Natural Science Foundation of China (31772408 to YZ;  
590 31672428 to HZ).

591 **Author contributions**

592 Y.H., Y.F., X.Y., L.C., R.Z., T.M., B.Y., H.H., Y. Zhou, X.T., S.W., L.L., P.Z., and  
593 B.H. performed the experiments and analyzed the data. Y. Zhao., H.Z., W.S., Q.S.,  
594 Z.S., and Y.R. designed and supervised the study. Y. Zhao. and H.Z. wrote the  
595 manuscript. All the authors edited the manuscript and approved the final manuscript.

596 **Competing interests**

597 The authors declare no competing interests.

## 598 **References**

- 599 1. Mariño, E. et al. Gut microbial metabolites limit the frequency of autoimmune T  
600 cells and protect against type 1 diabetes. *Nat. Immunol.* **18**(5), 552-562 (2017).
- 601 2. Gülden, E., Wongm F.S. & Wen L. The Gut Microbiota and Type 1 Diabetes. *Clin.*  
602 *Immunol.* **159**(2), 143-53 (2015).
- 603 3. Barkabi-Zanjani, S., Ghorbanzadeh, V., Aslani, M., Ghalibafabbaghi, A., Chodari,  
604 L. Diabetes mellitus and the impairment of male reproductive function: Possible  
605 signaling pathways. *Diabetes Metab. Syndr.* **14**(5), 1307-1314 (2020).
- 606 4. Maresch, C.C., Stute, D.C., Alves, M.G., Oliveira, P.F., de Kretser, D.M. & Linn,  
607 T. Diabetes-induced hyperglycemia impairs male reproductive function: a  
608 systematic review. *Hum. Reprod. Update* **24**(1), 86-105 (2018).
- 609 5. La Vignera, S. et al. Reproductive function in male patients with type 1 diabetes  
610 mellitus. *Andrology* **3**(6), 1082-1087 (2015).
- 611 6. Jangir, R.N. & Jain, G.C. Diabetes Mellitus Induced Impairment of Male  
612 Reproductive Functions: A Review. *Curr. Diabetes Rev.* **10**(3), 147-157 (2014).
- 613 7. Glazer, C.H. et al. Risk of diabetes according to male factor infertility: a register-  
614 based cohort study. *Hum. Reprod.* **32**(7), 1474-1481 (2017).
- 615 8. de Groot, P. et al. Faecal microbiota transplantation halts progression of human  
616 new- onset type 1 diabetes in a randomized controlled trial. *Gut* **70**(1), 92-105  
617 (2021).
- 618 9. Li, W.Z., Stirling, K., Yang, J.J. & Zhang, L. Gut microbiota and diabetes: From  
619 correlation to causality and mechanism. *World J. Diabetes* **11**(7), 293-308  
620 (2020).
- 621 10. Abdellatif, A.M. & Sarvetnick, N.E. Current understanding of the role of gut  
622 dysbiosis in type 1 diabetes. *J. Diabetes* **11**(8), 632-644 (2019).
- 623 11. Neuman, V. et al. Human gut microbiota transferred to germ-free NOD mice  
624 modulate the progression towards type 1 diabetes regardless of the pace of beta  
625 cell function loss in the donor. *Diabetologia* **62**(7), 1291-1296 (2019).
- 626 12. Knip, M. & Siljander, H. The role of the intestinal microbiota in type 1 diabetes  
627 mellitus. *Nat. Rev. Endocrinol.* **12**(3), 154-167 (2016).
- 628 13. Knip, M. & Honkanen, J. Modulation of Type 1 Diabetes Risk by the Intestinal  
629 Microbiome. *Curr. Diab. Rep.* **17**(11): 105 (2017).
- 630 14. Wen, L. et al. Innate immunity and intestinal microbiota in the development of

- 631 Type 1 diabetes. *Nature* **455**(7216), 1109-1113 (2008).
- 632 15. Kostic, A.D. et al. The Dynamics of the Human Infant Gut Microbiome in  
633 Development and in Progression towards Type 1 Diabetes. *Cell Host Microbe*  
634 **17**(2), 260-273 (2015).
- 635 16. Ding, N. et al. Impairment of spermatogenesis and sperm motility by the high- fat  
636 diet- induced dysbiosis of gut microbes. *Gut* **69**, 1608-1619 (2020).
- 637 17. Zhang, P. et al. Improvement in sperm quality and spermatogenesis following  
638 fecal microbiota transplantation from alginate oligosaccharide dosed mice. *Gut*  
639 **70**, 222-225 (2021).
- 640 18. Zhang, C. et al. Rescue of male fertility following fecal microbiota transplantation  
641 from alginate oligosaccharide dosed mice. *Gut* **70**(11), 2213-2215 (2021).
- 642 19. Zhang, T. et al. Disrupted spermatogenesis in a metabolic syndrome model: the  
643 role of vitamin A metabolism in the gut-testis axis. *Gut* (2021), doi:  
644 10.1136/gutjnl-2020-323347.
- 645 20. Simas, J.N., Mendes, T.B., Paccola, C.C., Vendramini, V. & Miraglia, S.M.  
646 Resveratrol attenuates reproductive alterations in type 1 diabetes-induced rats.  
647 *Int. J. Exp. Pathol.* **98**(6), 312-328 (2017).
- 648 21. Liu, Y., Yang, Z., Kong, D., Zhang, Y., Yu, W. & Zha, W. Metformin Ameliorates  
649 Testicular Damage in Male Mice with Streptozotocin-Induced Type 1 Diabetes  
650 through the PK2/PKR Pathway. *Oxid. Med. Cell Longev.* **2019**, 5681701 (2019).
- 651 22. Zhao, Y. et al. Alginate oligosaccharides improve germ cell development and  
652 testicular microenvironment to rescue busulfan disrupted spermatogenesis.  
653 *Theranostics* **10**, 3308-3324 (2020).
- 654 23. Bárcena, C. et al. Healthspan and lifespan extension by fecal microbiota  
655 transplantation into progeroid mice. *Nat. Med.* **25**, 1234-1242 (2019).
- 656 24. Brunse, A. et al. Effect of fecal microbiota transplantation route of administration  
657 on gut colonization and host response in preterm pigs. *ISME J.* **13**, 720-773  
658 (2019).
- 659 25. Chu, M. et al. MicroRNA-221 may be involved in lipid metabolism in mammary  
660 epithelial cells. *Int. J. Biochem. Cell Biol.* **97**, 118-127 (2018).
- 661 26. Kohyama, M. et al. Role for Spi-C in the development of red pulp macrophages  
662 and splenic iron homeostasis. *Nature* **457**, 318-321 (2009).
- 663 27. Malik, M. et al. Lactobacillus Plantarum 299v Supplementation Improves  
664 Vascular Endothelial Function and Reduces Inflammatory Biomarkers in Men

- 665 with Stable Coronary Artery Disease. *Circ. Res.* **123**(9), 1091-1102 (2018).
- 666 28. Wang, Q. et al. Lactobacillus helveticus R0052 alleviates liver injury by  
667 modulating gut microbiome and metabolome in D -galactosamine-treated rats.  
668 *Appl. Microbiol. Biotechnol.* **103**(23-24), 9673-9686 (2019).
- 669 29. Lew, L. et al. Lactobacillus Strains Alleviated Hyperlipidemia and Liver Steatosis  
670 in Aging Rats via Activation of AMPK. *Int. J. Mol. Sci.* **21**(16), 5872 (2020).
- 671 30. Hale, B.J. et al. Acyl-CoA synthetase 6 enriches seminiferous tubules with the n-3  
672 fatty acid docosahexaenoic acid and is required for male fertility in the mouse. *J.*  
673 *Biol. Chem.* **294**(39), 14394-14405 (2019).
- 674 31. Roqueta-Rivera, M. et al. Docosahexaenoic acid supplementation fully restores  
675 fertility and spermatogenesis in male delta-6 desaturase-null mice. *J. Lipid. Res.*  
676 **51**(2), 360-367 (2010).
- 677 32. Bunay, J. et al. A decrease of docosahexaenoic acid in testes of mice fed a high-fat  
678 diet is associated with impaired sperm acrosome reaction and fertility. *Asian J.*  
679 *Androl.* **23**(3), 306-313 (2021).
- 680 33. Griswold, M.D. Spermatogenesis: The commitment to meiosis. *Physiol. Rev.* **96**,  
681 1-17 (2016).
- 682 34. Bowles, J. et al. Retinoid signaling determines germ cell fate in mice. *Science* **312**,  
683 596-600 (2006).
- 684 35. Wolf, G. Is 9-cis-retinoic acid the endogenous ligand for the retinoic acid-X  
685 receptor? *Nutr. Rev.* **64**, 532-538 (2006).
- 686 36. Lengqvist, J. et al. Polyunsaturated fatty acids including docosahexaenoic and  
687 arachidonic acid bind to the retinoid X receptor alpha ligand-binding domain.  
688 *Mol. Cell Proteomics* **3**, 692-703 (2004).
- 689 37. Maharaj, D.S. et al. 6-Hydroxymelatonin protects against quinolinic-acid-induced  
690 oxidative neurotoxicity in the rat hippocampus. *J. Pharm. Pharmacol.* **57**(7),  
691 877-881 (2005).
- 692 38. Rosado, M.M. et al. Spleen development is modulated by neonatal gut microbiota.  
693 *Immunol. Lett* **199**, 1-15 (2018).
- 694 39. Carsetti, R. et al. Lack of Gut Secretory Immunoglobulin A in Memory B-Cell  
695 Dysfunction-Associated Disorders: A Possible Gut-Spleen Axis. *Front. Immunol.*  
696 **10**, 2937 (2020).
- 697 40. den Haan, J.M., Mebius, R.E. & Kraal, G. Stromal cells of the mouse spleen.  
698 *Front. Immunol.* **3**, 201 (2012).

- 699 41. Soares, M.P. & Hamza, I. Macrophages and Iron Metabolism. *Immunity* **44**, 492-  
700 504 (2016).
- 701 42. Gammella, E., Buratti, P., Cairo, G. & Recalcati, S. Macrophages: central  
702 regulators of iron balance. *Metallomics* **6**, 1336-1345 (2014).
- 703 43. Geng, T. et al. Probiotics Lactobacillus rhamnosus GG ATCC53103 and  
704 Lactobacillus plantarum JL01 induce cytokine alterations by the production of  
705 TCDA, DHA, and succinic and palmitic acids, and enhance immunity of weaned  
706 piglets. *Res. Vet. Sci.* **137**, 56-67 (2021).
- 707 44. Maragkoudakis, P.A. et al. Feed supplementation of Lactobacillus plantarum PCA  
708 236 modulates gut microbiota and milk fatty acid composition in dairy goats — a  
709 preliminary study. *Int. J. Food Microbiol.* **141** (Suppl 1), S109-16 (2010).

710

## Figure legends

711 **Fig. 1. A10-FMT decreased blood glucose, and improved semen quality in type 1**

712 **diabetes. a** Blood glucose levels. The y-axis represents the concentration (mmol/L).

713 The x-axis represents the treatment (n = 30/group). \* $p < 0.05$ . **b** Blood glycogen

714 levels. The y-axis represents the relative amount. The x-axis represents the treatment

715 (n = 30/group). \* $p < 0.05$ . **c** Sperm concentration. The y-axis represents the

716 concentration. The x-axis represents the treatment (n = 30/group). \* $p < 0.05$ . **d** Sperm

717 motility. The y-axis represents the percentage of cells. The x-axis represents the

718 treatment (n = 30/group). \* $p < 0.05$ .

719 **Fig. 2. A10-FMT improved small intestinal and cecal microbiota in type 1**

720 **diabetes. a** PLS-DA (OTU) of small intestine microbiota in HFD, A10-FMT, and

721 Con-FMT groups. **b** Small intestine microbiota levels at the genus level in STZ, A10-

722 FMT, and Con-FMT groups. The y-axis represents the relative amount (%). The x-

723 axis represents the treatments. Different colors represent different microbiota. **c**

724 Cladogram of the linear discriminate analysis effect size (LEfSe) determining the

725 difference in abundance of small intestine microbiota. **d** Changed microbiota in the

726 small intestine. The y-axis represents the relative amount at the genus level. The x-

727 axis represents the treatment. \* $p < 0.05$ . **e** PLS-DA (OTU) of cecum microbiota in

728 STZ, A10-FMT, and Con-FMT groups. **f** Cecum microbiota levels at the genus level

729 in STZ, A10-FMT, and Con-FMT groups. The y-axis represents the relative amount

730 (%). The x-axis represents the treatments. Different colors represent different

731 microbiota. **g** Cladogram of the LEfSe determining the cecum microbiota difference

732 in abundance. **h** Changed microbiota in the cecum. The y-axis represents the relative

733 amount at the genus level. The x-axis represents the treatment. \* $p < 0.05$ .

734 **Fig. 3. A10-FMT improved colon microbiota in type 1 diabetes. a** PLS-DA (OTU)

735 of colon microbiota in STZ, A10-FMT, and Con-FMT groups. **b** Colon microbiota  
736 levels at the genus level in STZ, A10-FMT, and Con-FMT groups. The y-axis  
737 represents the relative amount (%). The x-axis represents the treatments. Different  
738 colors represent different microbiota. **c** Cladogram of the LEfSe determining the  
739 difference in abundance of colon microbiota. **d** Changed microbiota in the colon. The  
740 y-axis represents the relative amount at the genus level. The x-axis represents the  
741 treatment.  $*p < 0.05$ . **e** Summary of signaling pathways of changed microbiota genes  
742 by Kyoto Encyclopedia of Genes and Genomes (KEGG) enrichment analysis. Red  
743 arrow indicates increased microbiota genes in each comparison. Blue arrow indicates  
744 decreased microbiota genes in each comparison.

745 **Fig. 4. A10-FMT improved blood metabolism.** **a** Blood carbohydrate levels in  
746 different treatments. The y-axis represents the fold change compared to control group  
747 (Con). The x-axis represents the treatment. **b** Blood flavonoid Kola flavanone levels  
748 in different treatments. The y-axis represents the relative amount. The x-axis  
749 represents the treatment.  $*p < 0.05$ . **c** Blood flavonoid Psoralenol levels in different  
750 treatments. The y-axis represents the relative amount. The x-axis represents the  
751 treatment.  $*p < 0.05$ . **d** Blood flavonoid 8-hydroxyapigenin 8-(2''-sulfatoglucuronide)  
752 levels in different treatments. The y-axis represents the relative amount. The x-axis  
753 represents the treatment.  $*p < 0.05$ . **e** Blood PC (17:1(9z)/0:0) levels in different  
754 treatments. The y-axis represents the relative amount. The x-axis represents the  
755 treatment.  $*p < 0.05$ . **f** Blood PC (17:0/0:0) levels in different treatments. The y-axis  
756 represents the relative amount. The x-axis represents the treatment.  $*p < 0.05$ . **g** Blood  
757 LysoPC (16:0) levels in different treatments. The y-axis represents the relative amount.  
758 The x-axis represents the treatment.  $*p < 0.05$ . **h** Blood LysoPC (18:0) levels in  
759 different treatments. The y-axis represents the relative amount. The x-axis represents



760 the treatment. \* $p < 0.05$ . **i** Blood melatonin levels in different treatments. The y-axis  
761 represents the relative amount. The x-axis represents the treatment. \* $p < 0.05$ . **j** Blood  
762 L-Carnitine levels in different treatments. The y-axis represents the relative amount.  
763 The x-axis represents the treatment. \* $p < 0.05$ . **k** Blood eicosapentaenoic acid (EPA)  
764 levels in different treatments. The y-axis represents the relative amount. The x-axis  
765 represents the treatment. \* $p < 0.05$ .

766 **Fig. 5. A10-FMT improved testicular metabolism.** **a** Testicular docosahexaenoic  
767 acid (DHA) levels in different treatments. The y-axis represents the relative amount.  
768 The x-axis represents the treatment. **b** Testicular EPA in different treatments. The y-  
769 axis represents the relative amount. The x-axis represents the treatment. \* $p < 0.05$ . **c**  
770 Testicular 9-hydroxy-2Z,5E,7Z,11Z,14Z-Eicosapentaenoic acid levels in different  
771 treatments. The y-axis represents the relative amount. The x-axis represents the  
772 treatment. \* $p < 0.05$ . **d** Testicular 4-oxo-Retinoic acid levels in different treatments.  
773 The y-axis represents the relative amount. The x-axis represents the treatment. \* $p <$   
774  $0.05$ . **e** Testicular 9-cis-retinal levels in different treatments. The y-axis represents the  
775 relative amount. The x-axis represents the treatment. \* $p < 0.05$ . **f** Testicular protein  
776 levels of *PLZF* and *DAZZL* in different treatments determined by Western blotting. **g**  
777 Testicular testosterone isocaproate levels in different treatments. The y-axis represents  
778 the relative amount. The x-axis represents the treatment. \* $p < 0.05$ . **h** Testicular  
779 testosterone glucuronide levels in different treatments. The y-axis represents the  
780 relative amount. The x-axis represents the treatment. \* $p < 0.05$ . **i** Testicular 7alpha-  
781 hydroxytestosterone levels in different treatments. The y-axis represents the relative  
782 amount. The x-axis represents the treatment. \* $p < 0.05$ . **j** Testicular stenbolone levels  
783 in different treatments. The y-axis represents the relative amount. The x-axis  
784 represents the treatment. \* $p < 0.05$ . **k** Testicular cortisol 21-acetate levels in different

785 treatments. The y-axis represents the relative amount. The x-axis represents the  
786 treatment. \* $p < 0.05$ . **l** Testicular PC (16:0/5:1(4E)) levels in different treatments. The  
787 y-axis represents the relative amount. The x-axis represents the treatment. \* $p < 0.05$ .  
788 **m** Testicular 6-hydroxymelatonin levels in different treatments. The y-axis represents  
789 the relative amount. The x-axis represents the treatment. \* $p < 0.05$ .

790 **Fig. 6. A10-FMT improved spermatogenesis process.** **a** IHF staining of testicular  
791 germ cell marker *VASA*, meiosis marker *SYCP3*, sperm protein *PGK2*, and transition  
792 protein 1 (*TPI*) in each treatment. Scale bar: 50 $\mu$ m. **b** Quantitative data for *VASA* IHF  
793 staining. The y-axis represents the percentage of total cell. The x-axis represents the  
794 treatment. \* $p < 0.05$ . **c** Quantitative data for *SYCP3* IHF staining. The y-axis  
795 represents the percentage of total cell. The x-axis represents the treatment. \* $p < 0.05$ .  
796 **d** Quantitative data for *TPI* IHF staining. The y-axis represents the percentage of total  
797 cell. The x-axis represents the treatment. \* $p < 0.05$ . **e** Quantitative data for *PGK2* IHF  
798 staining. The y-axis represents the percentage of total cells. The x-axis represents the  
799 treatment. \* $p < 0.05$ . **f** Western blotting analysis of the proteins of important genes for  
800 spermatogenesis in each treatment. **g** Quantitative data for Western blotting analysis.  
801 **h** IHF staining of Sertoli cell marker *SOX9*.

802 **Fig. 7. A10-FMT improved spleen function.** **a** Functional enrichment analysis of  
803 STZ decreased genes while they were increased by A10-FMT or Con-FMT. **b** IHF  
804 staining of *CD163* in spleen tissue. **c** IHF staining of *CCL21* in spleen tissue. **d** IHF  
805 staining of *CCR7* in spleen tissue. **e** Perl's Prussian blue stain for ferric iron in spleen  
806 tissue.

## 807 **Supplementary information**

### 808 **Supplementary Fig. 1. Body weight and gut microbiota changes (STZ vs. Con). a**

809 Animal bodyweight. The y-axis represents the body weight (g). The x-axis represents  
810 the age (weeks). **b** Blood insulin levels. The y-axis represents the concentration  
811 (mIU/L). The x-axis represents the treatment. **c** The alpha index of the small intestine  
812 microbiota (Chao index). The y-axis represents the relative amount. The x-axis  
813 represents the treatment. **d** The beta index of small intestinal microbiota. The y-axis  
814 represents the relative amount. The x-axis represents the treatment. **e** PLS-DA (OTU)  
815 of small intestine microbiota in STZ and Con groups. **f** Small intestine microbiota  
816 levels at the genus level in STZ and Con groups. The y-axis represents the relative  
817 amount (%). The x-axis represents the individual microbiota. **g** The alpha index of the  
818 cecum microbiota (Chao index). The y-axis represents the relative amount. The x-axis  
819 represents the treatment. **h** The beta index of cecum microbiota. The y-axis represents  
820 the relative amount. The x-axis represents the treatment. **i** PLS-DA (OTU) of cecum  
821 microbiota in STZ and Con groups. **j** Cecum microbiota levels at the genus level in  
822 STZ and Con groups. The y-axis represents the relative amount (%). The x-axis  
823 represents the individual microbiota. **k** The alpha index of the colon microbiota (Chao  
824 index). The y-axis represents the relative amount. The x-axis represents the treatment.  
825 **l** The beta index of colon microbiota. The y-axis represents the relative amount. The  
826 x-axis represents the treatment. **m** PLS-DA (OTU) of colon microbiota in STZ and  
827 Con groups. **n** Colon microbiota levels at the genus level in STZ and Con groups. The  
828 y-axis represents the relative amount (%). The x-axis represents the individual  
829 microbiota.

### 830 **Supplementary Fig. 2. Blood metabolism changes. a** Blood flavonoid Malvidin 3-

831 O-(6-O-(4-O-feruloyl-alpha-rhamnopyranosyl)-beta-glucopyranoside)-5-beta-glucopy

832 -ranoside levels. The y-axis represents the relative amount (%). The x-axis represents  
833 the treatments. **b** Blood glycerophosphocholine levels in different treatments. The y-  
834 axis represents the fold change compared to control group (Con). The x-axis  
835 represents the treatment. **c** Blood LysoPC (15:0) levels. The y-axis represents the  
836 relative amount (%). The x-axis represents the treatments. **d** Blood LysoPC [18:1(9z)]  
837 levels. The y-axis represents the relative amount (%). The x-axis represents the  
838 treatments. **e** Blood LysoPC [22:6(4Z,7Z,10Z,13Z,16Z,19Z)] levels. The y-axis  
839 represents the relative amount (%). The x-axis represents the treatments. **f** Blood PE  
840 [22:2(13Z,16Z)/0:0] levels. The y-axis represents the relative amount (%). The x-axis  
841 represents the treatments. **g** Blood PE (22:0/0:0) levels. The y-axis represents the  
842 relative amount (%). The x-axis represents the treatments. **h** Blood PE [22:1(11Z)/0:0]  
843 levels. The y-axis represents the relative amount (%). The x-axis represents the  
844 treatments. **i** Blood LysoPE [0:0/24:6(6Z,9Z,12Z,15Z,18Z,21Z)] levels. The y-axis  
845 represents the relative amount (%). The x-axis represents the treatments.

846 **Supplementary Fig. 3. Testicular metabolite changes.** **a** Testicular 4,8,12,15,18-  
847 eicosapentaenoic acid levels. The y-axis represents the relative amount (%). The x-  
848 axis represents the treatments. **b** Testicular retinoids levels in different treatments.  
849 The y-axis represents the fold change compared to the control group (Con). The x-  
850 axis represents the treatment. **c** Testicular retinol levels. The y-axis represents the  
851 relative amount (%). The x-axis represents the treatments. **d** Testicular retinyl ester  
852 levels. The y-axis represents the relative amount (%). The x-axis represents the  
853 treatments. **e** Testicular testosterone levels in different treatments. The y-axis  
854 represents the fold change compared to control group (Con). The x-axis represents the  
855 treatment. **f** Testicular testosterone propionate levels. The y-axis represents the  
856 relative amount (%). The x-axis represents the treatments. **g** Testicular testosterone

857 acetate levels. The y-axis represents the relative amount (%). The x-axis represents  
858 the treatments. **h** Testicular steroids levels in different treatments. The y-axis  
859 represents the fold change compared to control group (Con). The x-axis represents the  
860 treatment. **i** Testicular 3b,17b-Dihydroxyetiocholane levels. The y-axis represents the  
861 relative amount (%). The x-axis represents the treatments. **j** Testicular 5-Androstene-  
862 3b,16b,17a-triol levels. The y-axis represents the relative amount (%). The x-axis  
863 represents the treatments. **k** Testicular 3beta,17alpha,21-Trihydroxy-pregnenone  
864 levels. The y-axis represents the relative amount (%). The x-axis represents the  
865 treatments. **l** Testicular asterogenol levels. The y-axis represents the relative amount  
866 (%). The x-axis represents the treatments. **m** Testicular PCs levels in different  
867 treatments. The y-axis represents the fold change compared to the control group (Con).  
868 The x-axis represents the treatment. **n** Testicular) PC(4:0/18:1(9Z) level. The y-axis  
869 represents the relative amount (%). The x-axis represents the treatments. **o** Testicular  
870 PC (8:0/8:0) levels. The y-axis represents the relative amount (%). The x-axis  
871 represents the treatments.

872 **Supplementary Fig. 4. Additional data for spleen.** **a** PCA for RNA-seq analysis of  
873 spleen. **b** The functional enrichment analysis of STZ increased genes while these were  
874 decreased by A10-FMT or Con-FMT. **c** IHF staining of *ki67* in the spleen. **d** Western  
875 blotting analysis of *p53*, *Bax* and *Bcl-xl* in the spleen.

876 **Supplementary Fig. 5. A10-FMT improved liver function and systemic anti-**  
877 **oxidative capability.** **a** Blood alanine aminotransferase (ALT) levels. The y-axis  
878 represents the relative amount (%). The x-axis represents the treatments. **b** PCA for  
879 RNA-seq analysis of liver. **c** The functional enrichment analysis of STZ decreased  
880 genes while these were increased by A10-FMT or Con-FMT in the liver. **d** The  
881 functional enrichment analysis of STZ increased genes while these were decreased by

882 A10-FMT or Con-FMT in the liver. **e** Blood total triglyceride (TG) levels. The y-axis  
883 represents the relative amount (%). The x-axis represents the treatments. **f** Blood total  
884 cholesterol (TC) levels. The y-axis represents the relative amount (%). The x-axis  
885 represents the treatments. **g** Blood total antioxidant capability (T-AOC) levels. The y-  
886 axis represents the relative amount (%). The x-axis represents the treatments. **h** Blood  
887 total SOD levels. The y-axis represents the relative amount (%). The x-axis represents  
888 the treatments. **i** Blood catalase levels. The y-axis represents the relative amount (%).  
889 The x-axis represents the treatments. **j** Blood glutathione levels. The y-axis represents  
890 the relative amount (%). The x-axis represents the treatments. **k** Western blotting  
891 analysis of *Bax* and *Bcl-xl* in the liver.

892

893 **Supplementary Table 1. Primary antibody information.**

894

895 **Data Set 1. Blood metabolites raw data.**

896 **Data Set 2. Testicular metabolites raw data.**

897

**a**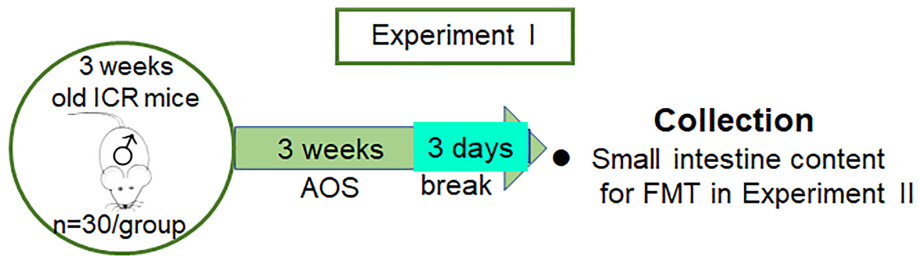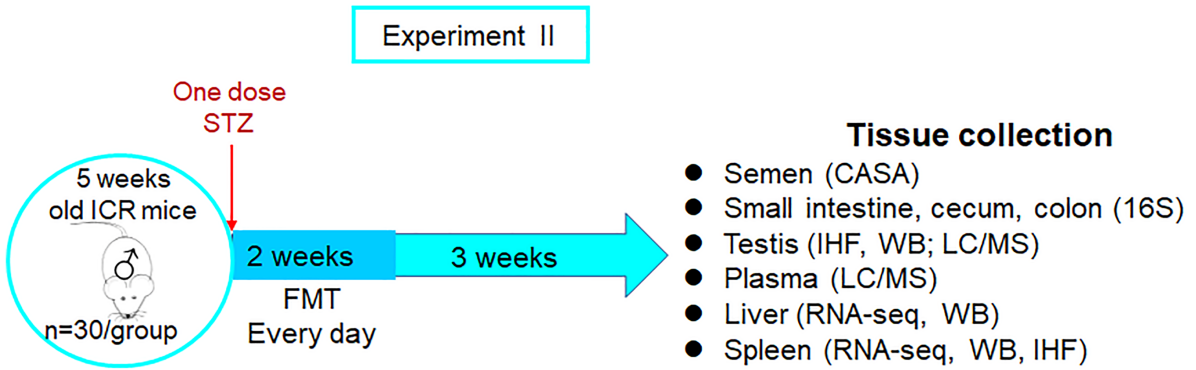**b**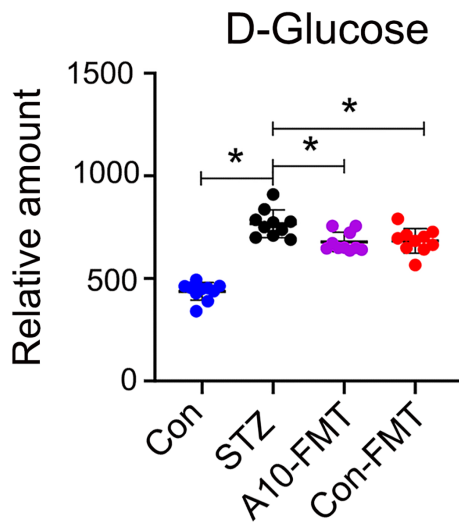**c**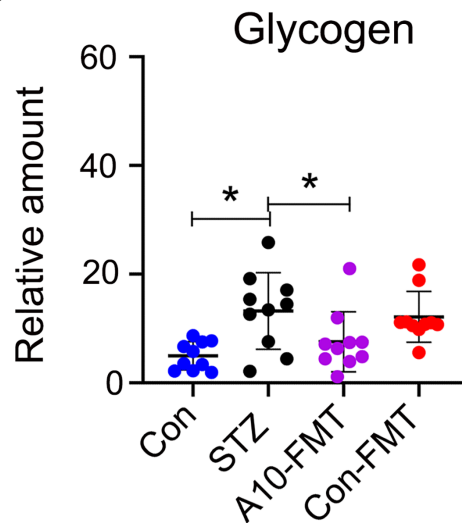**d**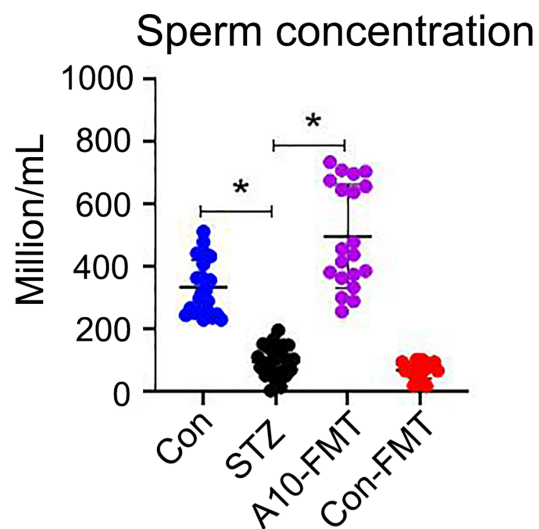**e**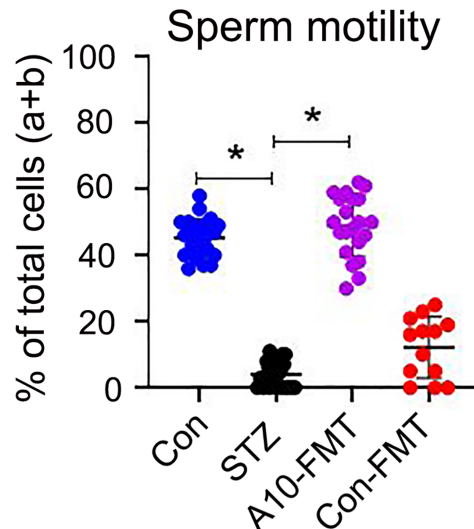

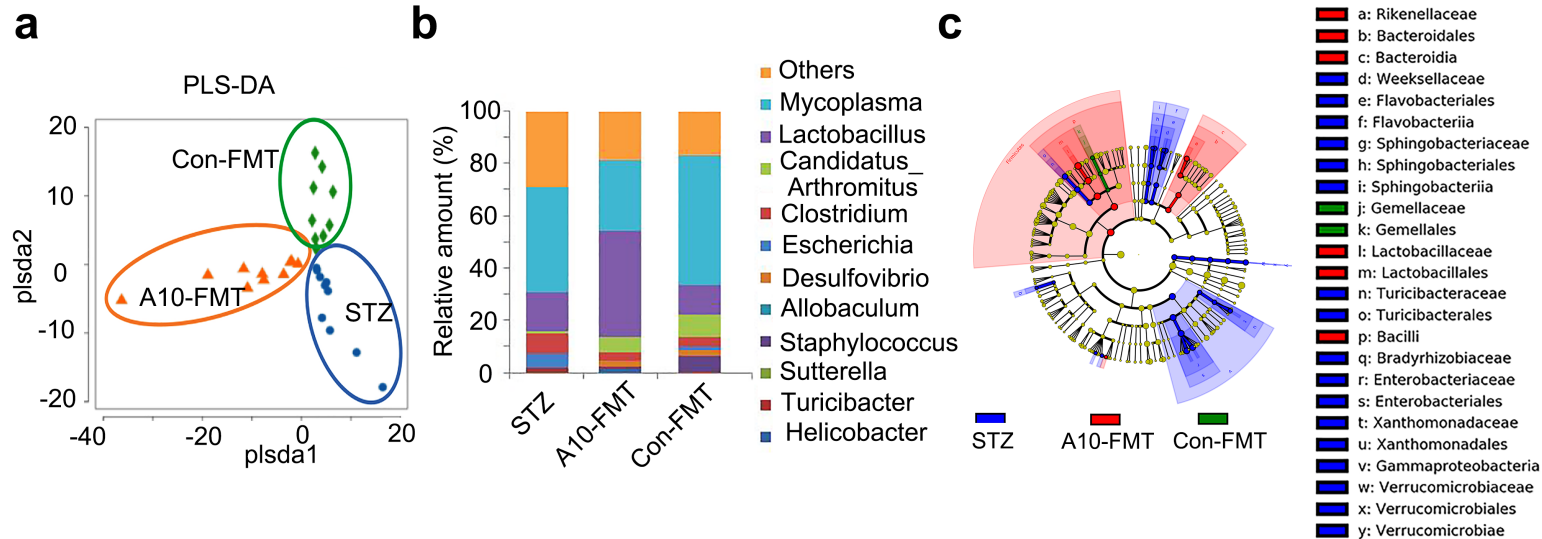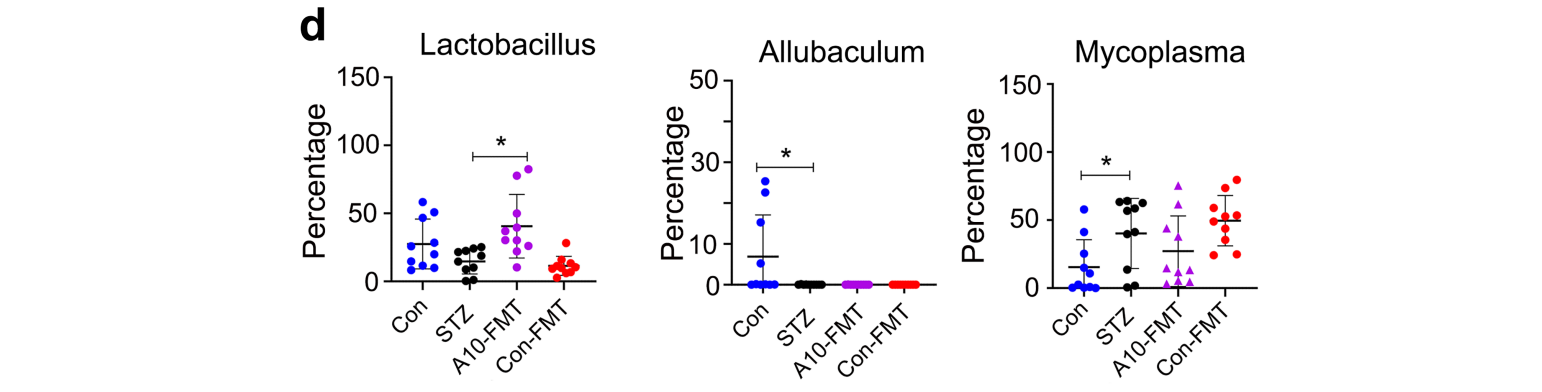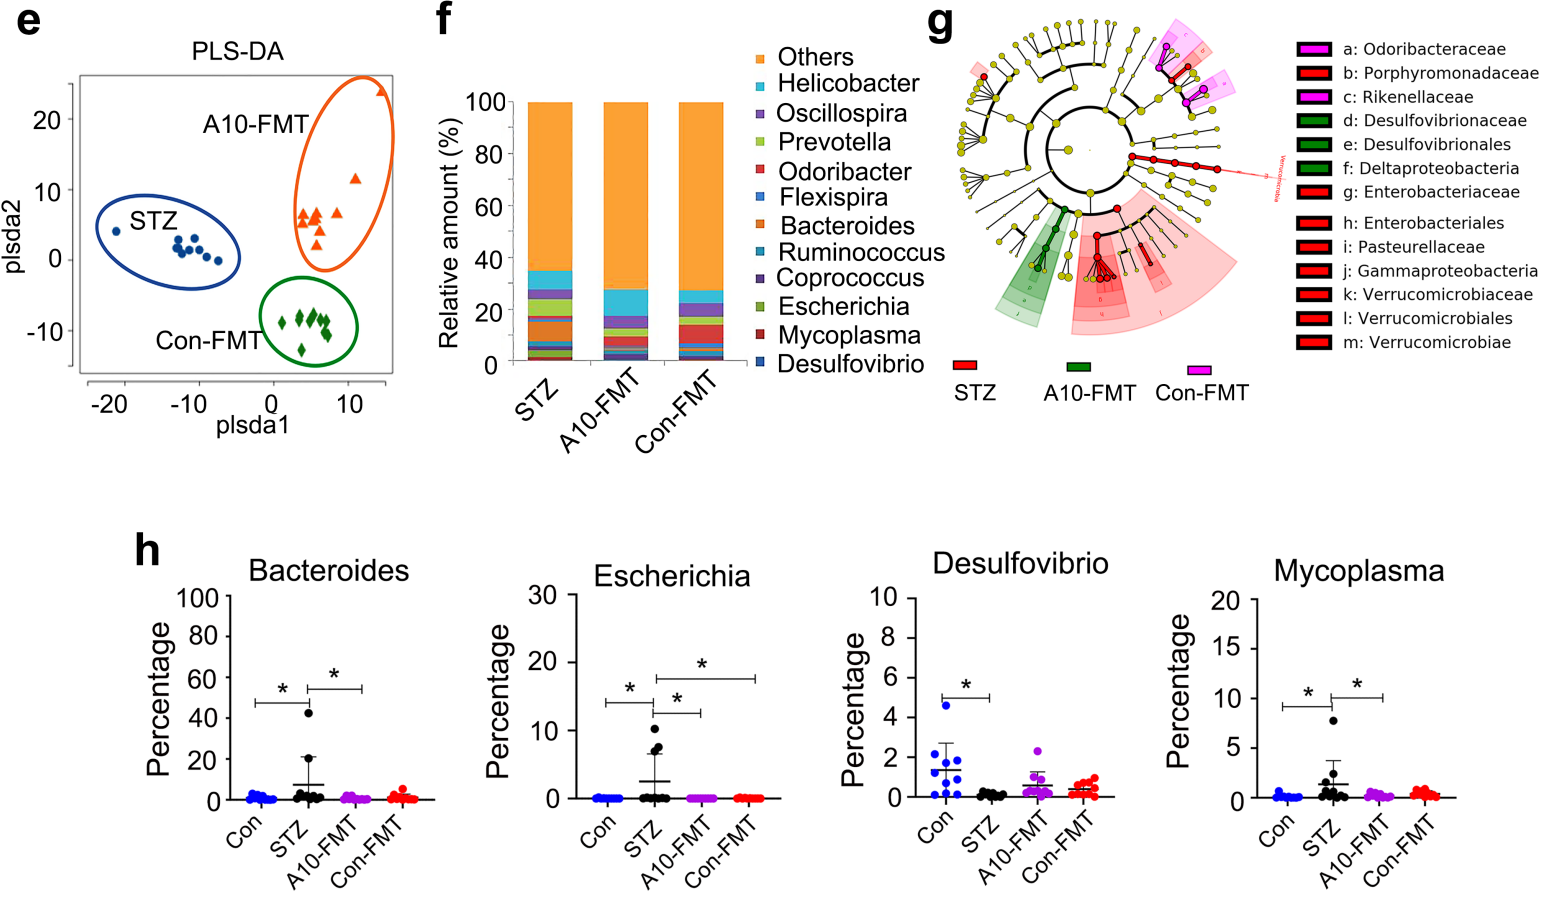



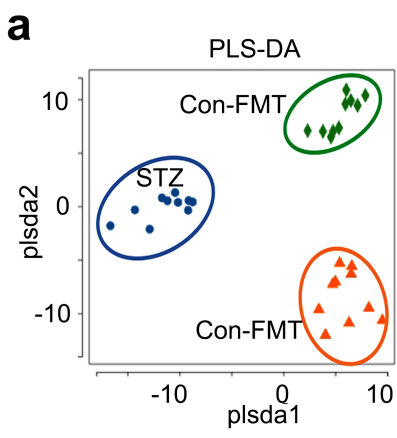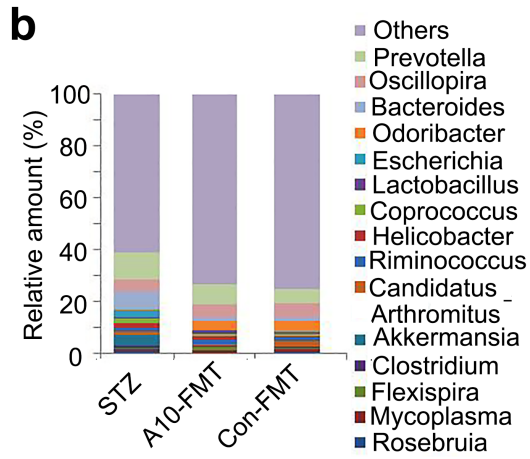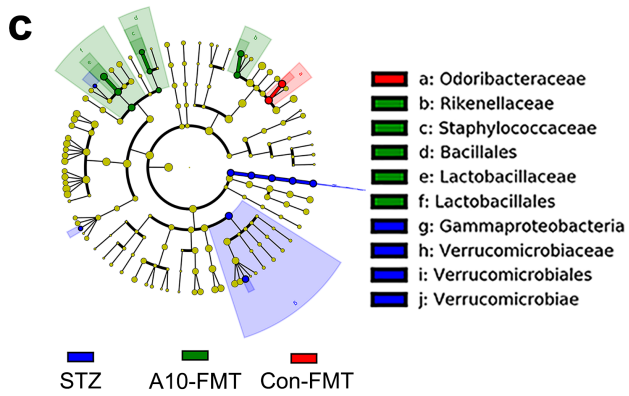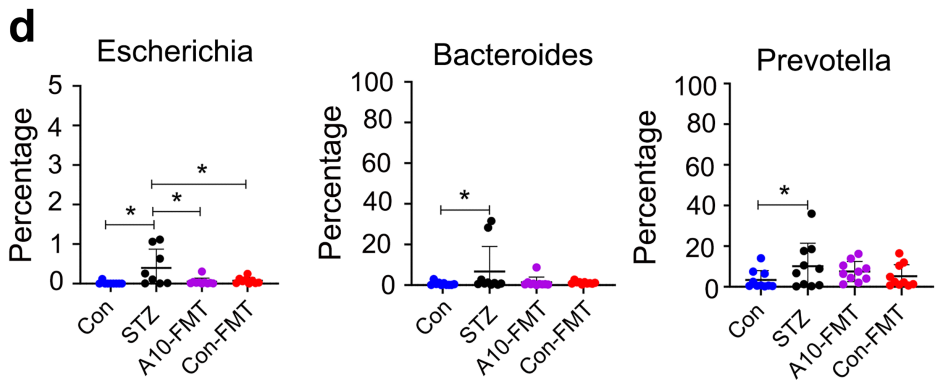

**e**

|                                             | Small intestine |              |              | Cecum    |              |              | Colon    |              |               |
|---------------------------------------------|-----------------|--------------|--------------|----------|--------------|--------------|----------|--------------|---------------|
|                                             | STZ /Con        | A10-FMT /STZ | Con-FMT /STZ | STZ /Con | A10-FMT /STZ | Con-FMT /STZ | STZ /Con | A10-FMT /STZ | Con-FMT /HSTZ |
| Biosynthesis of other secondary metabolites | ↑               | —            | —            | ↓        | ↓            | —            | —        | ↑            | —             |
| Metabolism of terpenoids and polyketides    | ↓               | ↓            | ↓            | —        | —            | ↑            | ↑        | ↑            | ↑             |
| Energy metabolism                           | ↓               | ↓            | ↓            | —        | ↓            | ↓            | ↓        | ↑            | —             |
| Glycan biosynthesis and metabolism          | ↑               | —            | —            | ↓        | ↓            | ↓            | ↓        | —            | ↓             |
| Membrane transport                          | ↑               | ↑            | —            | —        | ↑            | ↑            | ↑        | ↑            | —             |
| Xenobiotics biodegradation and metabolism   | ↓               | ↑            | ↑            | ↓        | —            | —            | —        | —            | —             |
| Amino acid metabolism                       | —               | ↓            | ↓            | —        | —            | ↑            | —        | —            | —             |
| Carbohydrate metabolism                     | —               | ↑            | ↓            | —        | —            | —            | —        | —            | ↓             |
| Metabolism of other amino acid              | —               | ↑            | ↑            | ↓        | —            | ↓            | ↓        | —            | —             |
| Metabolism of cofactors and vitamins        | —               | ↓            | ↓            | ↓        | ↓            | ↓            | ↓        | —            | ↓             |
| Lipid metabolism                            | —               | ↑            | ↑            | —        | —            | ↑            | ↑        | —            | ↑             |
| Cell motility                               | —               | —            | ↑            | ↑        | ↑            | ↑            | ↑        | —            | —             |

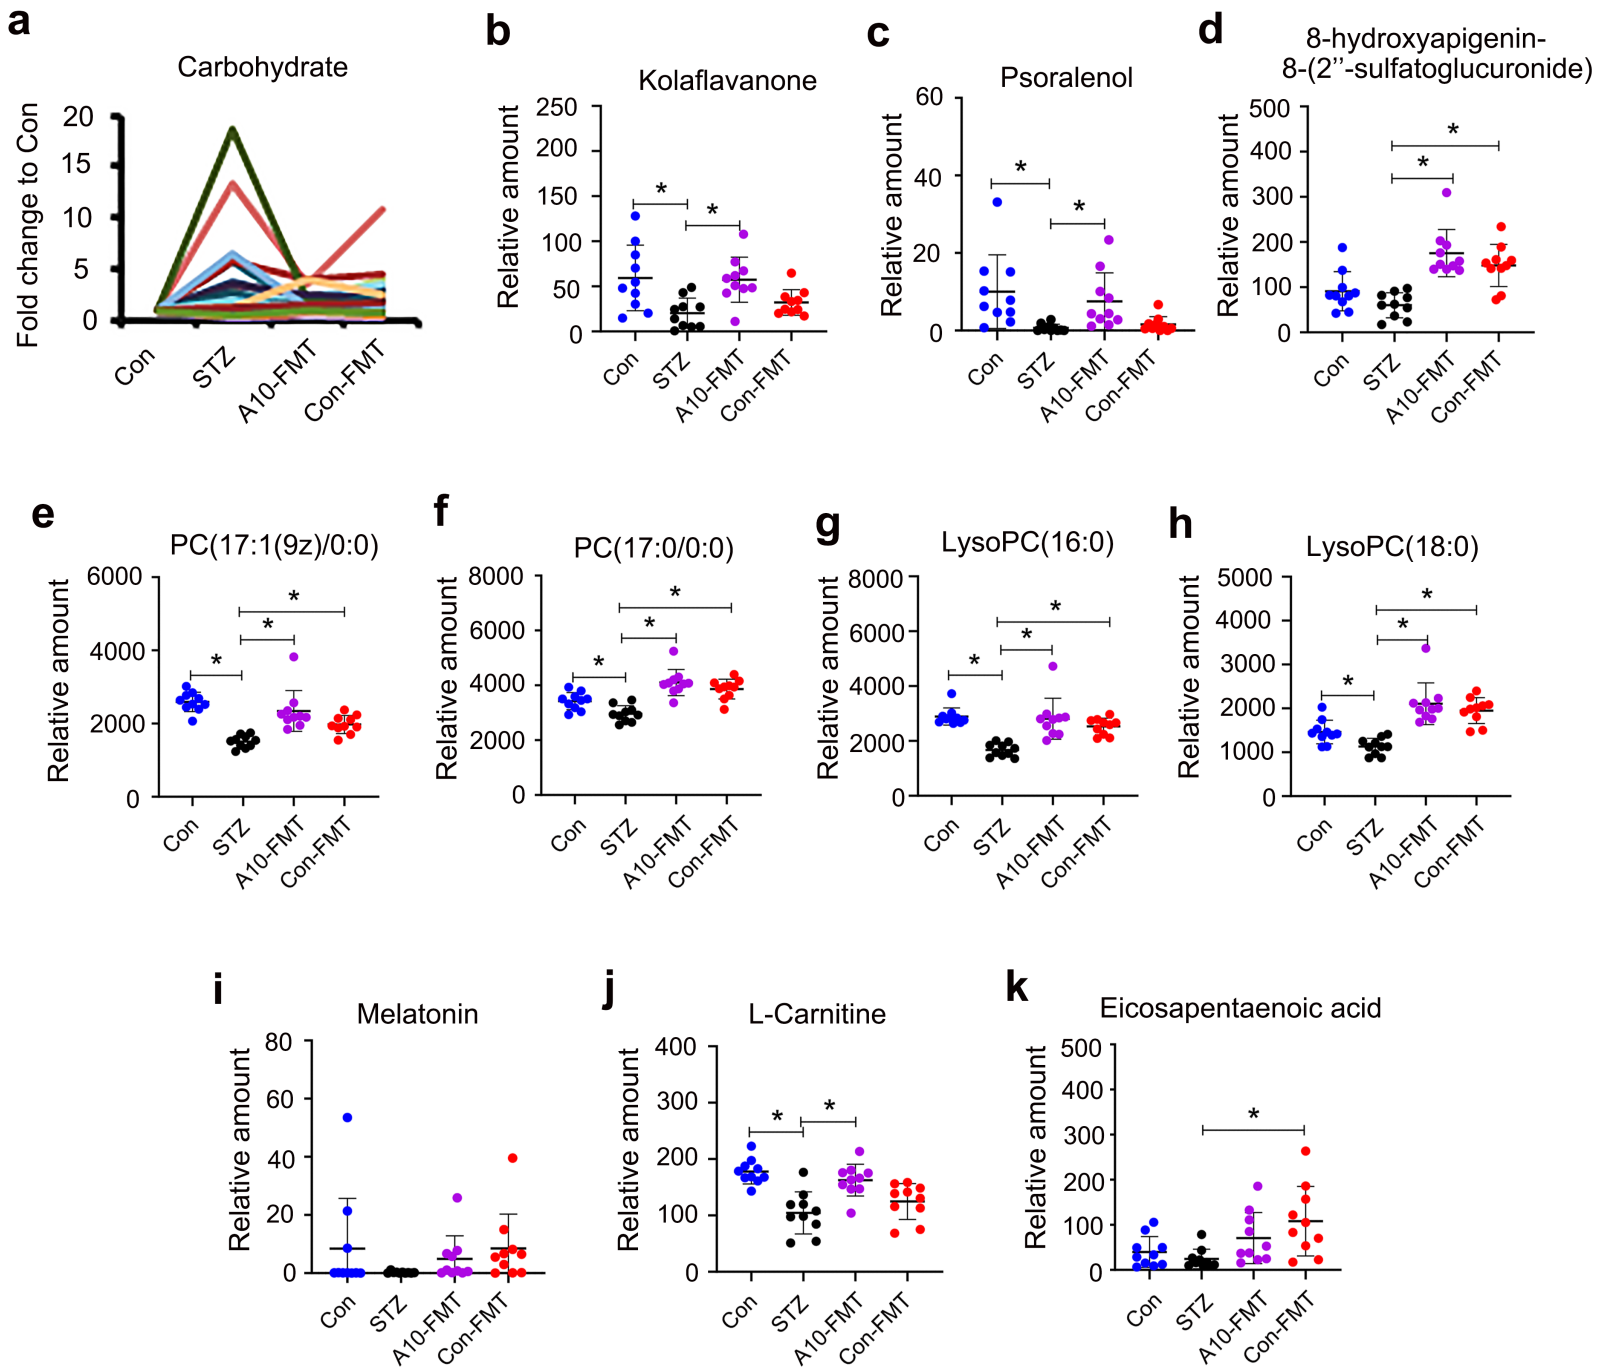

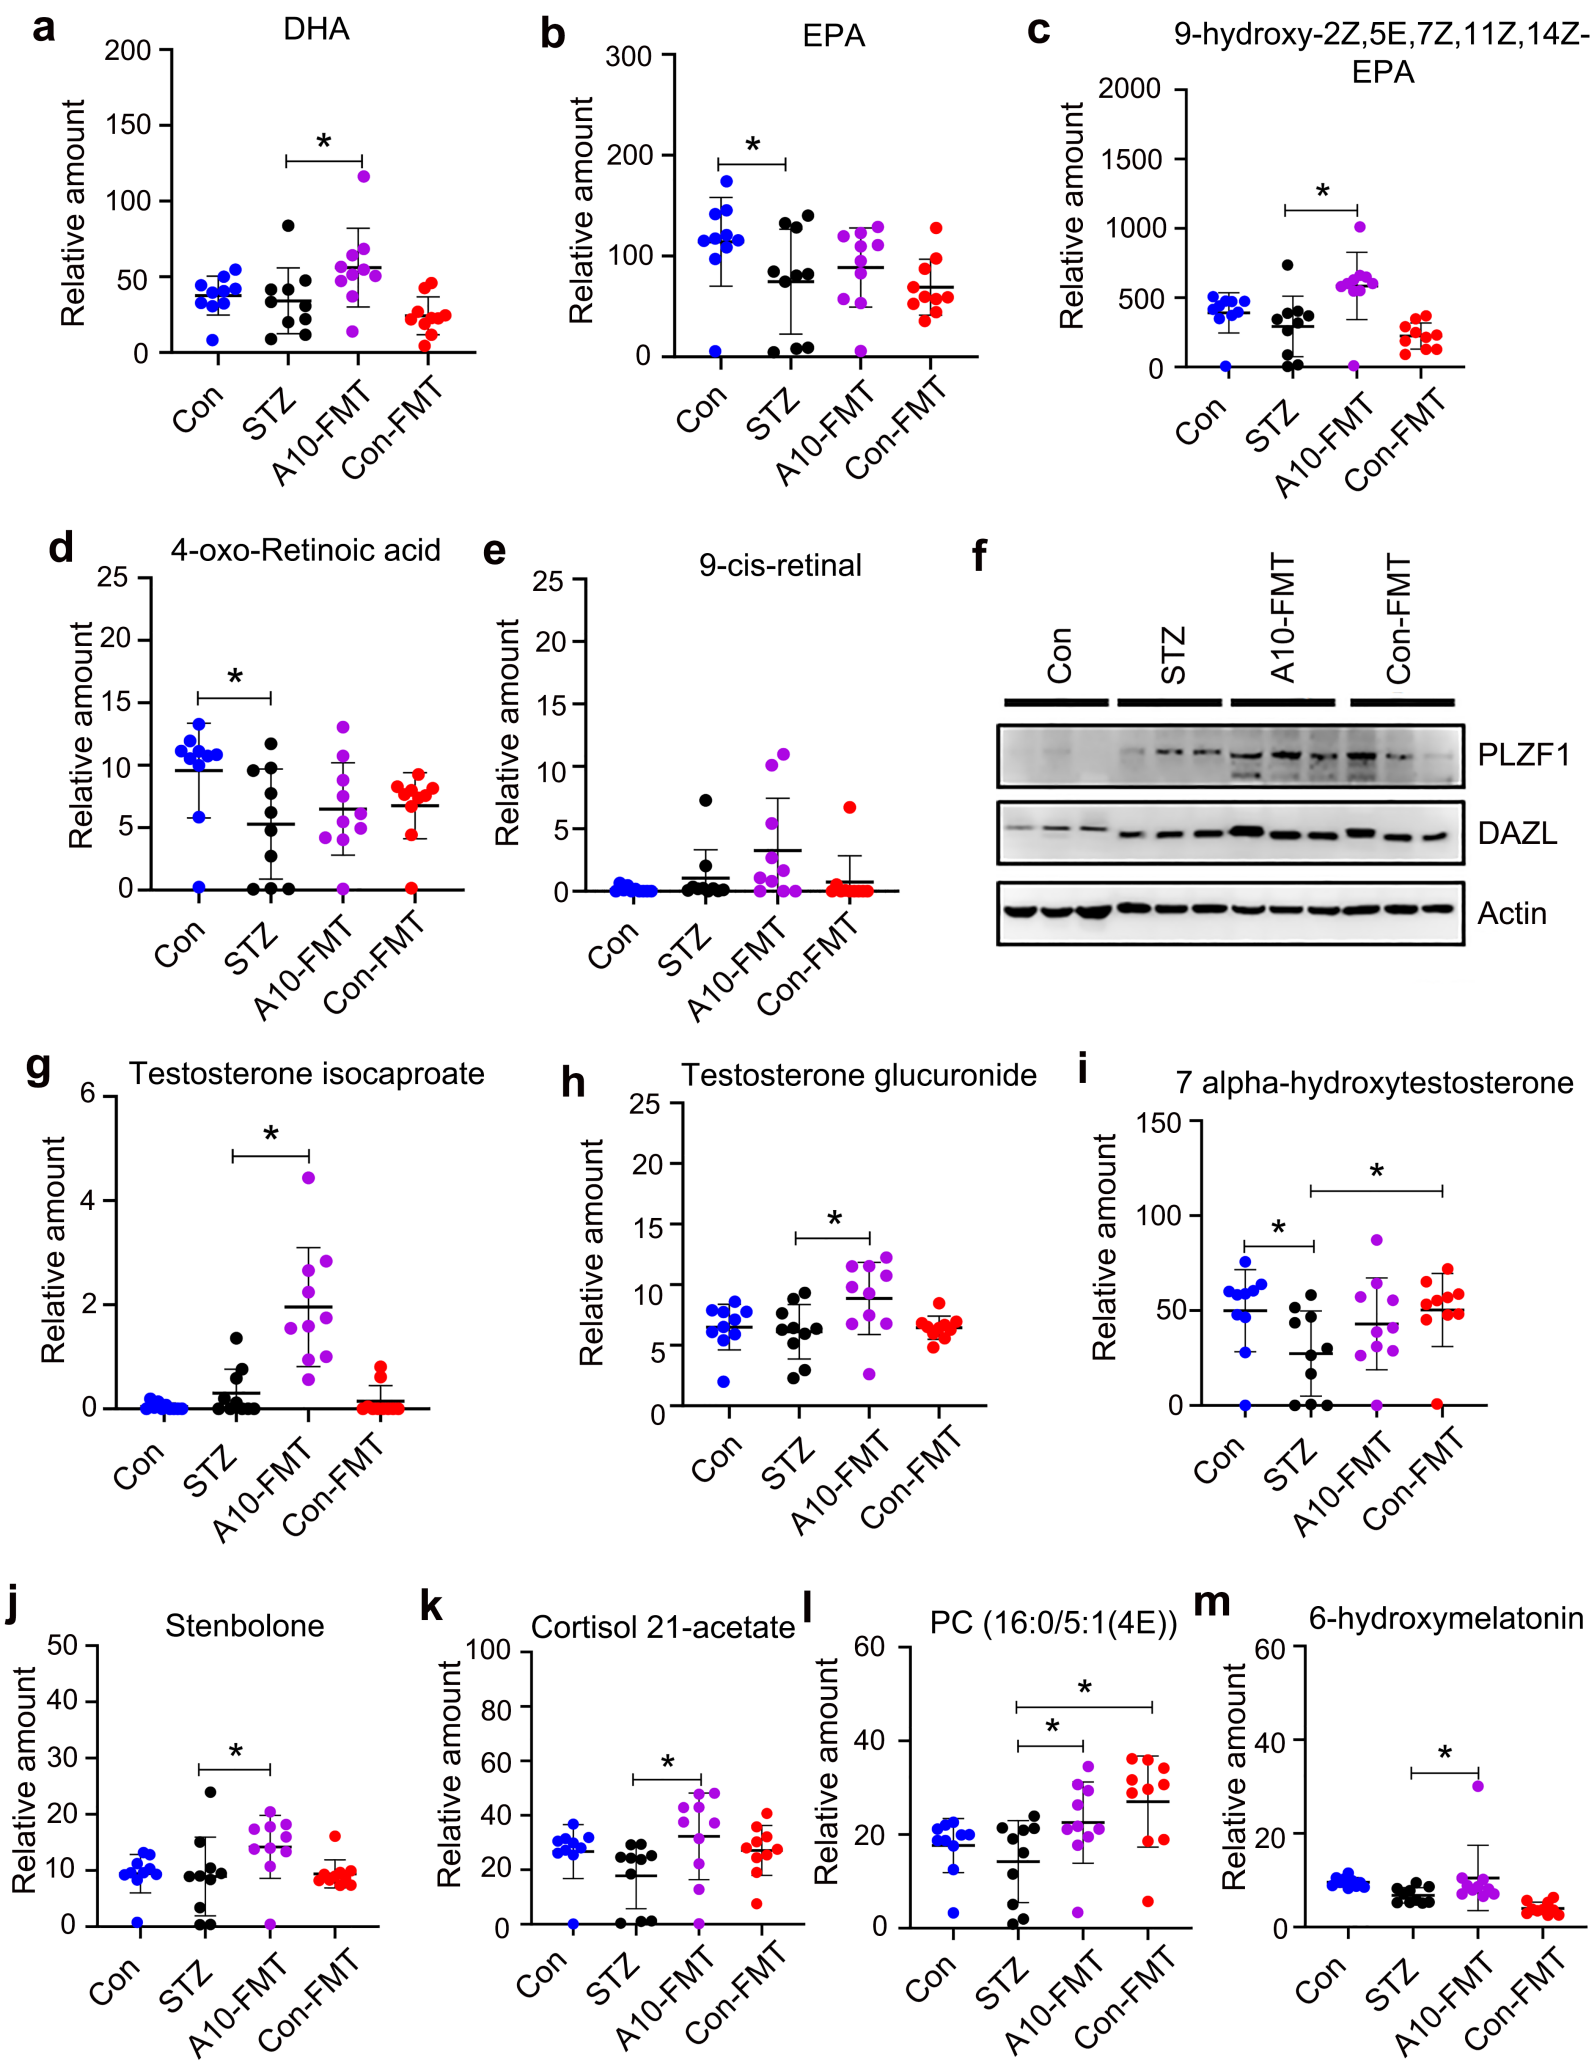

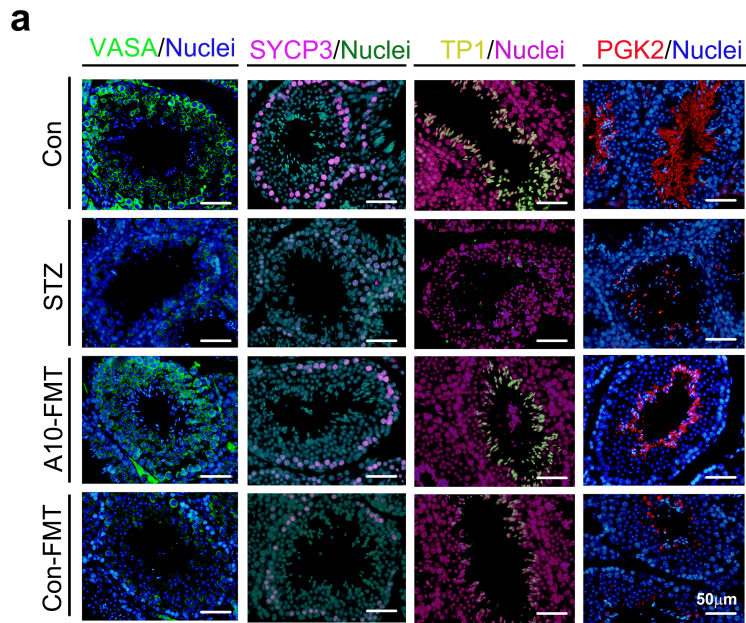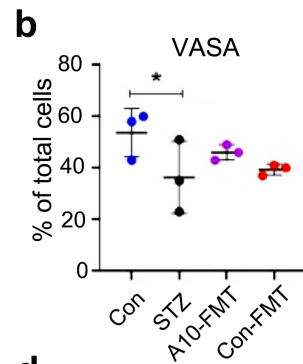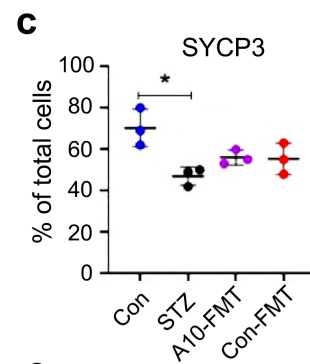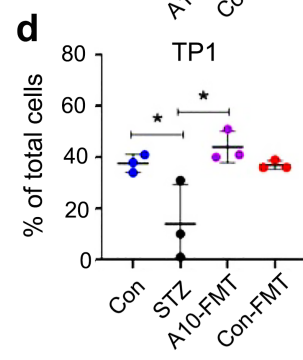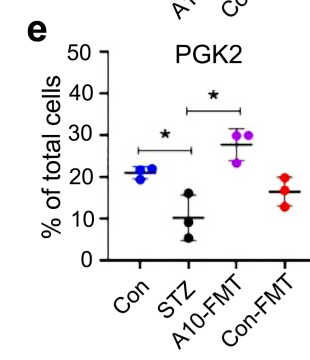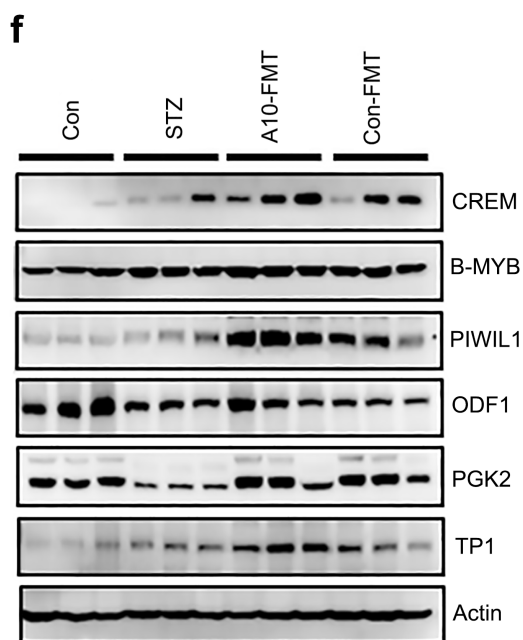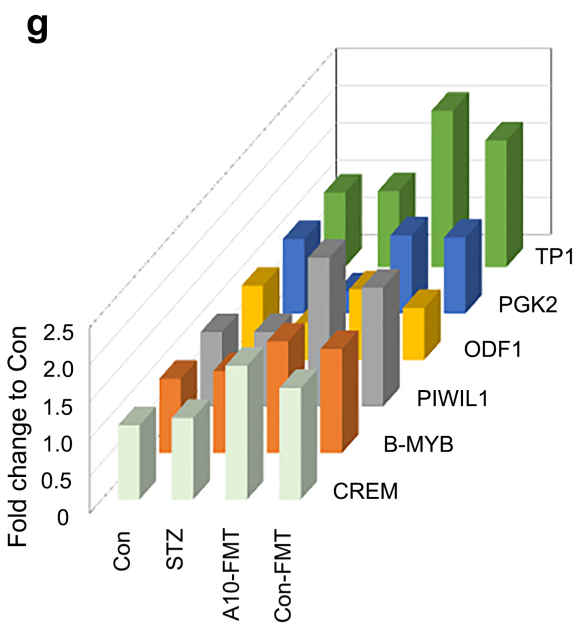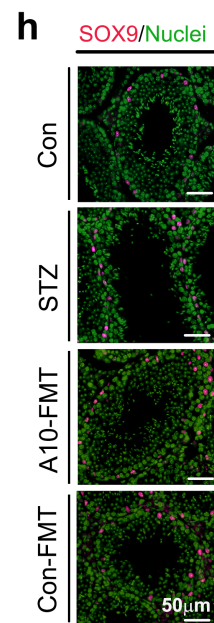

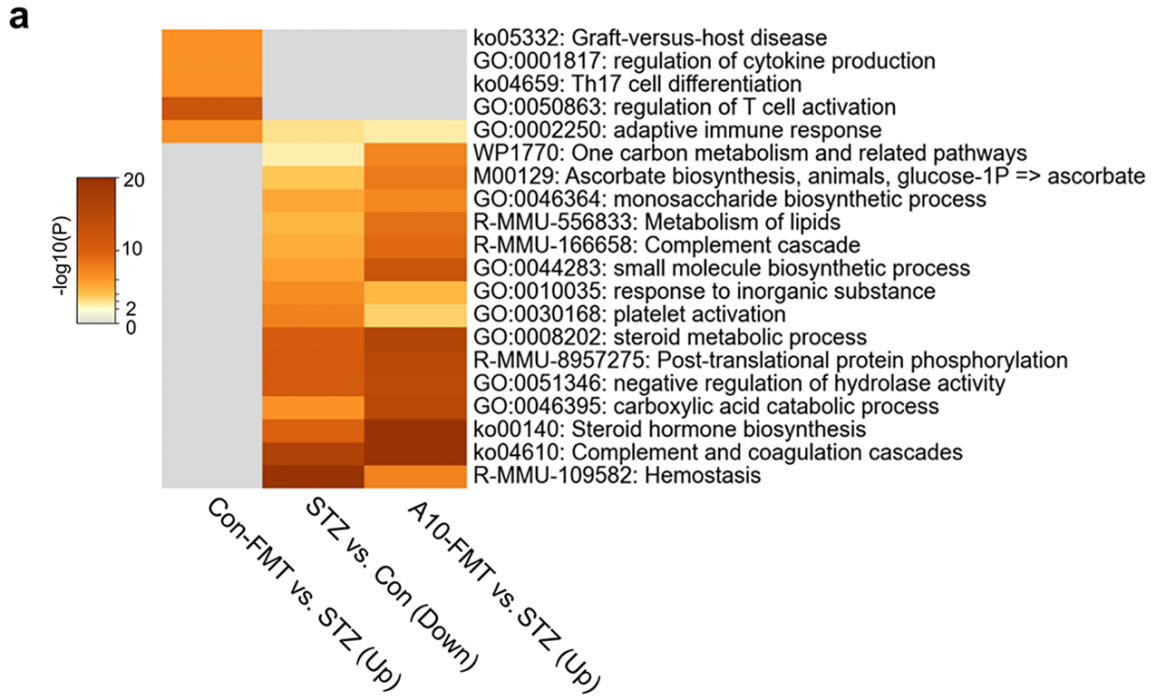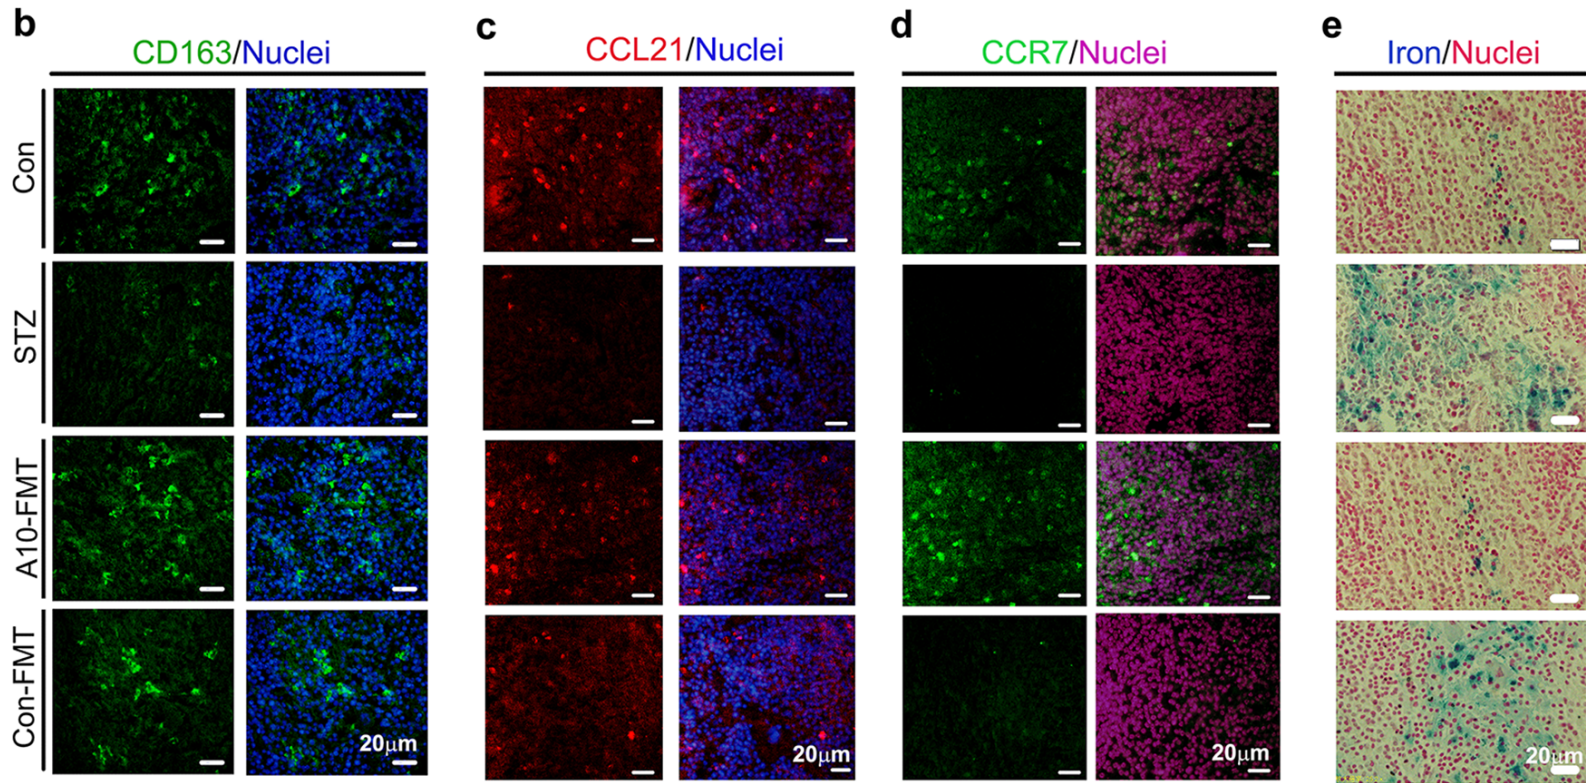

Source: https://biorxiv.org/content/10.1101/2021.11.24.469971v1.full.pdf
